# Supplementary material for: The differential expression of alternatively polyadenylated transcripts is a common stress-induced response mechanism that modulates mammalian mRNA expression in a quantitative and qualitative fashion
Source: RNA. 2016 Sep;22(9):1441–53. doi: 10.1261/rna.055657.115 (PMC4986898; doi:10.1261/rna.055657.115)
Supplement: Supplemental Material [file supp_055657.115_Supplemental_Table_S1.xlsx]

## Sheet: Sheet3
DEXSeq_padjust	DEXSeq_log2fc (Aniso/DMSO)	DEXSeq_status	gid	gname	biotype	chrome	strand	position	mRNA Seq_log2fc (Aniso/DMSO)	mRNA Seq_padj	pre-mRNA Seq_log2fc (Aniso/DMSO)	pre-mRNA Seq_padj
0.625772	-0.146669	no_significant_change	ENSG00000003509	C2orf56	protein_coding	chr2	+	37475567	0.380735	5.25e-05	-0.372634	0.0086888
0.754106	-0.102872	no_significant_change	ENSG00000003509	C2orf56	protein_coding	chr2	+	37476301
0.0471339	0.558615	sig_UP_in_Aniso	ENSG00000003509	C2orf56	protein_coding	chr2	+	37480544
0.99501	-0.129354	no_significant_change	ENSG00000004478	FKBP4	protein_coding	chr12	+	2912521	-0.0106416	0.974378	-0.685128	0.000428997
0.446176	-0.0758394	no_significant_change	ENSG00000004478	FKBP4	protein_coding	chr12	+	2913104
0.634499	0.316024	no_significant_change	ENSG00000004478	FKBP4	protein_coding	chr12	+	2913979
0.0187796	0.304766	sig_UP_in_Aniso	ENSG00000004478	FKBP4	protein_coding	chr12	+	2914575
0.726761	0.263969	no_significant_change	ENSG00000004478	FKBP4	protein_coding	chr12	+	2914633
1.07575e-05	-0.115873	sig_DOWN_in_Aniso	ENSG00000006194	ZNF263	protein_coding	chr16	+	3341451	0.0877434	0.171956	-0.175375	0.249115
0.0010557	0.737321	sig_UP_in_Aniso	ENSG00000006194	ZNF263	protein_coding	chr16	+	3351401
0.096763	-0.514696	sig_DOWN_in_Aniso	ENSG00000006607	FARP2	protein_coding	chr2	+	242388720	-0.0616869	0.540513	0.860971	6.28e-07
0.884956	0.453192	no_significant_change	ENSG00000006607	FARP2	protein_coding	chr2	+	242405442
0.27928	0.300937	no_significant_change	ENSG00000006607	FARP2	protein_coding	chr2	+	242434255
0.0159782	0.0829883	sig_UP_in_Aniso	ENSG00000006740	ARHGAP44	protein_coding	chr17	+	12894959	0.324952	5.82e-06	-0.7671	2.09e-06
0.139593	-0.717743	no_significant_change	ENSG00000006740	ARHGAP44	protein_coding	chr17	+	13506084
0.184009	0.630114	no_significant_change	ENSG00000007341	ST7L	protein_coding	chr1	-	113066141	0.752085	7.51e-18	0.469965	9.51e-05
0.00653642	1.01099	sig_UP_in_Aniso	ENSG00000007341	ST7L	protein_coding	chr1	-	113067500
0.0959602	0.408875	sig_UP_in_Aniso	ENSG00000007341	ST7L	protein_coding	chr1	-	113068503
0.997295	0.0595712	no_significant_change	ENSG00000007341	ST7L	protein_coding	chr1	-	113083418
0.0175272	-0.287579	sig_DOWN_in_Aniso	ENSG00000007341	ST7L	protein_coding	chr1	-	113149301
0.142041	-0.334274	no_significant_change	ENSG00000007341	ST7L	protein_coding	chr1	-	113153076
0.0287213	0.0724462	sig_UP_in_Aniso	ENSG00000007923	DNAJC11	protein_coding	chr1	-	6694229	0.194645	0.000559075	-0.302569	0.0433256
0.106358	-0.312883	no_significant_change	ENSG00000007923	DNAJC11	protein_coding	chr1	-	6695179
0.0720903	-0.298546	sig_DOWN_in_Aniso	ENSG00000011114	BTBD7	protein_coding	chr14	-	93703896	-1.22507	8.25e-57	-0.641359	2.42e-07
0.625551	0.156475	no_significant_change	ENSG00000011114	BTBD7	protein_coding	chr14	-	93753974
0.670405	0.249565	no_significant_change	ENSG00000011114	BTBD7	protein_coding	chr14	-	93790109
0.0900908	-0.25285	sig_DOWN_in_Aniso	ENSG00000011198	ABHD5	protein_coding	chr3	+	43760291	0.679264	2.07e-16	1.20041	3.19e-08
0.619908	0.346381	no_significant_change	ENSG00000011198	ABHD5	protein_coding	chr3	+	43761291
0.563984	0.142724	no_significant_change	ENSG00000011198	ABHD5	protein_coding	chr3	+	43761365
0.911014	-0.171427	no_significant_change	ENSG00000011198	ABHD5	protein_coding	chr3	+	43764216
0.382746	0.745539	no_significant_change	ENSG00000011198	ABHD5	protein_coding	chr3	+	43775862
0.0613587	-0.0571129	sig_DOWN_in_Aniso	ENSG00000011485	PPP5C	protein_coding	chr19	+	46894103	-0.103196	0.282003	-0.865213	4.21e-12
0.342503	0.313585	no_significant_change	ENSG00000011485	PPP5C	protein_coding	chr19	+	46896157
0.663186	0.381138	no_significant_change	ENSG00000011485	PPP5C	protein_coding	chr19	+	46896230
0.998637	0.00332136	no_significant_change	ENSG00000019995	ZRANB1	protein_coding	chr10	+	126663119	0.609527	1.31e-38	0.61505	0.741464
0.996337	0.0293923	no_significant_change	ENSG00000019995	ZRANB1	protein_coding	chr10	+	126674198
0.283789	0.170311	no_significant_change	ENSG00000019995	ZRANB1	protein_coding	chr10	+	126674569
0.998696	0.0647159	no_significant_change	ENSG00000019995	ZRANB1	protein_coding	chr10	+	126675027
0.978144	0.208585	no_significant_change	ENSG00000019995	ZRANB1	protein_coding	chr10	+	126675999
0.0080348	-0.919187	sig_DOWN_in_Aniso	ENSG00000019995	ZRANB1	protein_coding	chr10	+	126676481
0.016897	-0.387899	sig_DOWN_in_Aniso	ENSG00000019995	ZRANB1	protein_coding	chr10	+	126676756
0.0894561	-0.203449	sig_DOWN_in_Aniso	ENSG00000021776	AQR	protein_coding	chr15	-	35143983	0.417806	2.73e-07	0.305319	0.0095446
0.978144	0.120231	no_significant_change	ENSG00000021776	AQR	protein_coding	chr15	-	35144123
0.768002	0.21725	no_significant_change	ENSG00000021776	AQR	protein_coding	chr15	-	35145987
0.532878	0.154201	no_significant_change	ENSG00000021776	AQR	protein_coding	chr15	-	35148710
0.57023	-0.321188	no_significant_change	ENSG00000033800	PIAS1	protein_coding	chr15	+	68480334	-0.213289	0.00678065	-0.253728	0.074259
0.99501	-0.0441708	no_significant_change	ENSG00000033800	PIAS1	protein_coding	chr15	+	68480402
0.9681	-0.0779615	no_significant_change	ENSG00000033800	PIAS1	protein_coding	chr15	+	68480722
0.897715	0.269097	no_significant_change	ENSG00000033800	PIAS1	protein_coding	chr15	+	68481006
0.999592	-0.0738426	no_significant_change	ENSG00000033800	PIAS1	protein_coding	chr15	+	68481338
0.993928	-0.0812715	no_significant_change	ENSG00000033800	PIAS1	protein_coding	chr15	+	68483800
0.0011653	1.86216	sig_UP_in_Aniso	ENSG00000033800	PIAS1	protein_coding	chr15	+	68490937
0.0279726	0.431993	sig_UP_in_Aniso	ENSG00000042286	AIFM2	protein_coding	chr10	-	71872031	0.0674087	0.557039	-0.598648	0.000774527
0.00960406	-0.239321	sig_DOWN_in_Aniso	ENSG00000042286	AIFM2	protein_coding	chr10	-	71873736
0.460988	0.4105	no_significant_change	ENSG00000047056	WDR37	protein_coding	chr10	+	1096200	0.429639	1.83e-08	0.562528	0.00516755
0.335748	0.50849	no_significant_change	ENSG00000047056	WDR37	protein_coding	chr10	+	1175626
0.00836583	-0.284031	sig_DOWN_in_Aniso	ENSG00000047056	WDR37	protein_coding	chr10	+	1178092
0.418506	-0.313338	no_significant_change	ENSG00000049759	NEDD4L	protein_coding	chr18	+	55712729	0.636661	4.65e-41	0.428753	0.00846859
0.99501	-0.03447	no_significant_change	ENSG00000049759	NEDD4L	protein_coding	chr18	+	56063805
0.999592	-0.0403111	no_significant_change	ENSG00000049759	NEDD4L	protein_coding	chr18	+	56063934
0.0261514	0.513511	sig_UP_in_Aniso	ENSG00000049759	NEDD4L	protein_coding	chr18	+	56064636
0.999592	-0.0220712	no_significant_change	ENSG00000049759	NEDD4L	protein_coding	chr18	+	56068760
0.0805402	0.154032	sig_UP_in_Aniso	ENSG00000061455	PRDM6	protein_coding	chr5	+	122523744	0.555586	1.02e-11	-1.25753	3.28e-20
0.232688	-0.451291	no_significant_change	ENSG00000061455	PRDM6	protein_coding	chr5	+	122529954
0.0581206	-0.194704	sig_DOWN_in_Aniso	ENSG00000062650	WAPAL	protein_coding	chr10	-	88195012	0.0414965	0.75278	0.0436427	0.755492
0.0330472	0.10677	sig_UP_in_Aniso	ENSG00000062650	WAPAL	protein_coding	chr10	-	88196767
0.000242427	0.0765091	sig_UP_in_Aniso	ENSG00000064607	SUGP2	protein_coding	chr19	-	19101701	0.747368	9.12e-29	-0.687495	1.02e-05
0.0344094	-0.73432	sig_DOWN_in_Aniso	ENSG00000064607	SUGP2	protein_coding	chr19	-	19104346
0.0720903	0.0397985	sig_UP_in_Aniso	ENSG00000065548	ZC3H15	protein_coding	chr2	+	187374085	-0.0127002	0.936543	0.454615	0.00252845
0.297484	-0.533107	no_significant_change	ENSG00000065548	ZC3H15	protein_coding	chr2	+	187374702
0.119128	0.19651	no_significant_change	ENSG00000065802	ASB1	protein_coding	chr2	+	239355371	-1.71074	3.37e-112	-0.563267	0.00364998
0.610406	0.22064	no_significant_change	ENSG00000065802	ASB1	protein_coding	chr2	+	239355559
0.775311	0.241814	no_significant_change	ENSG00000065802	ASB1	protein_coding	chr2	+	239355610
0.00182721	-0.278585	sig_DOWN_in_Aniso	ENSG00000065802	ASB1	protein_coding	chr2	+	239360890
0.0165088	-0.646425	sig_DOWN_in_Aniso	ENSG00000069020	MAST4	protein_coding	chr5	+	66226789	1.09615	6.84e-57	0.733576	6.33e-05
0.0197059	-0.35943	sig_DOWN_in_Aniso	ENSG00000069020	MAST4	protein_coding	chr5	+	66282350
1.32015e-05	0.328378	sig_UP_in_Aniso	ENSG00000069020	MAST4	protein_coding	chr5	+	66465417
0.0390117	-0.539471	sig_DOWN_in_Aniso	ENSG00000069667	RORA	protein_coding	chr15	-	60780483	1.02085	9.93e-28	-0.284745	0.113686
0.00335703	0.79028	sig_UP_in_Aniso	ENSG00000069667	RORA	protein_coding	chr15	-	60785330
0.979543	-0.1136	no_significant_change	ENSG00000069667	RORA	protein_coding	chr15	-	60789458
0.0511163	0.030358	sig_UP_in_Aniso	ENSG00000070087	PFN2	protein_coding	chr3	-	149682692	-0.558581	3.43e-07	-0.658156	2.52e-05
0.257344	-0.601663	no_significant_change	ENSG00000070087	PFN2	protein_coding	chr3	-	149699457
0.00836583	0.0765471	sig_UP_in_Aniso	ENSG00000070413	DGCR2	protein_coding	chr22	-	19023799	-0.146311	0.195153	-0.026596	0.863118
0.256069	-0.376587	no_significant_change	ENSG00000070413	DGCR2	protein_coding	chr22	-	19033673
0.283654	-0.486945	no_significant_change	ENSG00000070413	DGCR2	protein_coding	chr22	-	19108761
0.0528836	0.219283	sig_UP_in_Aniso	ENSG00000070476	ZXDC	protein_coding	chr3	-	126156443	0.237322	0.00042835	0.355507	0.0530012
0.771597	-0.26045	no_significant_change	ENSG00000070476	ZXDC	protein_coding	chr3	-	126173668
0.249275	-0.283811	no_significant_change	ENSG00000070476	ZXDC	protein_coding	chr3	-	126177744
0.641496	-0.262893	no_significant_change	ENSG00000070718	AP3M2	protein_coding	chr8	+	42023298	0.423123	7.03e-05	-0.87385	1.22e-08
0.222917	-0.540568	no_significant_change	ENSG00000070718	AP3M2	protein_coding	chr8	+	42026659
0.056171	0.13785	sig_UP_in_Aniso	ENSG00000070718	AP3M2	protein_coding	chr8	+	42028700
0.191606	0.511315	no_significant_change	ENSG00000070886	EPHA8	protein_coding	chr1	+	22903531	-0.21543	0.283501	-1.69263	1.67e-24
0.067087	-0.168524	sig_DOWN_in_Aniso	ENSG00000070886	EPHA8	protein_coding	chr1	+	22916110
0.0241315	-0.260087	sig_DOWN_in_Aniso	ENSG00000074603	DPP8	protein_coding	chr15	-	65734805	0.595691	2.5e-08	0.397992	0.00812226
0.236089	0.380382	no_significant_change	ENSG00000074603	DPP8	protein_coding	chr15	-	65737253
0.0358993	0.299167	sig_UP_in_Aniso	ENSG00000074603	DPP8	protein_coding	chr15	-	65737305
0.996337	0.0214129	no_significant_change	ENSG00000074603	DPP8	protein_coding	chr15	-	65739076
0.618459	-0.315862	no_significant_change	ENSG00000074603	DPP8	protein_coding	chr15	-	65804301
0.249275	0.420464	no_significant_change	ENSG00000074935	TUBE1	protein_coding	chr6	-	112391980	0.589027	1.61e-06	-0.459092	0.00527988
0.0842045	-0.14997	sig_DOWN_in_Aniso	ENSG00000074935	TUBE1	protein_coding	chr6	-	112397478
0.0509478	0.0239614	sig_UP_in_Aniso	ENSG00000075415	SLC25A3	protein_coding	chr12	+	98995485	-0.467817	6.78e-07	-0.0171694	0.936185
0.32494	-0.506655	no_significant_change	ENSG00000075415	SLC25A3	protein_coding	chr12	+	98995721
0.142374	1.11198	no_significant_change	ENSG00000075426	FOSL2	protein_coding	chr2	+	28635799	2.01877	5.48e-166	1.37538	3.44e-06
0.506281	0.176033	no_significant_change	ENSG00000075426	FOSL2	protein_coding	chr2	+	28639557
0.947662	0.181091	no_significant_change	ENSG00000075426	FOSL2	protein_coding	chr2	+	28639757
0.0411256	-0.334282	sig_DOWN_in_Aniso	ENSG00000075426	FOSL2	protein_coding	chr2	+	28640177
0.993459	-0.0443169	no_significant_change	ENSG00000075975	MKRN2	protein_coding	chr3	+	12623953	-0.43286	1.61e-13	0.0244218	0.855995
0.998637	-0.105632	no_significant_change	ENSG00000075975	MKRN2	protein_coding	chr3	+	12624869
0.160607	-0.199401	no_significant_change	ENSG00000075975	MKRN2	protein_coding	chr3	+	12625197
5.16732e-06	1.57885	sig_UP_in_Aniso	ENSG00000075975	MKRN2	protein_coding	chr3	+	12626278
0.000465651	1.12131	sig_UP_in_Aniso	ENSG00000075975	MKRN2	protein_coding	chr3	+	12627315
0.0423	0.306252	sig_UP_in_Aniso	ENSG00000076650	GPATCH1	protein_coding	chr19	+	33621205	0.583027	0.000124268	-0.0536897	0.694195
0.0362483	-0.254991	sig_DOWN_in_Aniso	ENSG00000076650	GPATCH1	protein_coding	chr19	+	33621312
0.992742	0.0154243	no_significant_change	ENSG00000076685	NT5C2	protein_coding	chr10	-	104847794	0.65352	5.93e-13	0.695545	4.35e-07
0.610406	0.0851648	no_significant_change	ENSG00000076685	NT5C2	protein_coding	chr10	-	104847912
0.0728524	-0.444845	sig_DOWN_in_Aniso	ENSG00000076685	NT5C2	protein_coding	chr10	-	104901806
0.0769335	-0.274529	sig_DOWN_in_Aniso	ENSG00000077684	PHF17	protein_coding	chr4	+	129785078	0.25352	8.57e-05	-0.234028	0.147374
0.998699	0.0499113	no_significant_change	ENSG00000077684	PHF17	protein_coding	chr4	+	129785235
0.235484	0.157627	no_significant_change	ENSG00000077684	PHF17	protein_coding	chr4	+	129794411
0.942508	-0.0693285	no_significant_change	ENSG00000077684	PHF17	protein_coding	chr4	+	129796378
0.998637	0.136596	no_significant_change	ENSG00000078687	TNRC6C	protein_coding	chr17	+	76000312	0.338289	4.08e-07	0.472638	0.00353459
0.875116	-0.0755942	no_significant_change	ENSG00000078687	TNRC6C	protein_coding	chr17	+	76001555
0.0498067	-0.54598	sig_DOWN_in_Aniso	ENSG00000078687	TNRC6C	protein_coding	chr17	+	76008594
0.697505	0.186794	no_significant_change	ENSG00000078687	TNRC6C	protein_coding	chr17	+	76103541
0.337422	0.297702	no_significant_change	ENSG00000081692	JMJD4	protein_coding	chr1	-	227918878	not detected		not detected
0.467149	0.0684081	no_significant_change	ENSG00000081692	JMJD4	protein_coding	chr1	-	227918933
0.99501	0.0184918	no_significant_change	ENSG00000081692	JMJD4	protein_coding	chr1	-	227919788
0.0967013	-0.169899	sig_DOWN_in_Aniso	ENSG00000081692	JMJD4	protein_coding	chr1	-	227920003
0.998637	0.0479334	no_significant_change	ENSG00000082805	ERC1	protein_coding	chr12	+	1310425	-0.508021	1.62e-10	0.223071	0.140592
0.984263	-0.0597091	no_significant_change	ENSG00000082805	ERC1	protein_coding	chr12	+	1310477
0.909374	0.054632	no_significant_change	ENSG00000082805	ERC1	protein_coding	chr12	+	1310546
0.971054	0.0762444	no_significant_change	ENSG00000082805	ERC1	protein_coding	chr12	+	1310604
0.777767	0.30734	no_significant_change	ENSG00000082805	ERC1	protein_coding	chr12	+	1310683
0.991788	0.0598963	no_significant_change	ENSG00000082805	ERC1	protein_coding	chr12	+	1310876
0.784788	-0.170657	no_significant_change	ENSG00000082805	ERC1	protein_coding	chr12	+	1311178
0.929917	0.156868	no_significant_change	ENSG00000082805	ERC1	protein_coding	chr12	+	1311897
0.661978	-0.113069	no_significant_change	ENSG00000082805	ERC1	protein_coding	chr12	+	1313177
0.545217	-0.153782	no_significant_change	ENSG00000082805	ERC1	protein_coding	chr12	+	1317939
0.102946	-0.284594	no_significant_change	ENSG00000082805	ERC1	protein_coding	chr12	+	1325244
0.0929509	-0.995981	sig_DOWN_in_Aniso	ENSG00000082805	ERC1	protein_coding	chr12	+	1333026
0.899276	0.283703	no_significant_change	ENSG00000082805	ERC1	protein_coding	chr12	+	1604002
0.0258107	0.312395	sig_UP_in_Aniso	ENSG00000082805	ERC1	protein_coding	chr12	+	1605097
0.0651946	0.243751	sig_UP_in_Aniso	ENSG00000083223	ZCCHC6	protein_coding	chr9	-	88902648	0.88071	1.2e-06	0.418814	0.00296392
0.998637	-0.0202798	no_significant_change	ENSG00000083223	ZCCHC6	protein_coding	chr9	-	88910217
0.138481	-0.247719	no_significant_change	ENSG00000083223	ZCCHC6	protein_coding	chr9	-	88912849
0.911424	-0.0523398	no_significant_change	ENSG00000086061	DNAJA1	protein_coding	chr9	+	33039064	-0.197832	0.126043	0.832041	4.98e-07
0.985231	-0.0777409	no_significant_change	ENSG00000086061	DNAJA1	protein_coding	chr9	+	33039312
0.933504	0.0144229	no_significant_change	ENSG00000086061	DNAJA1	protein_coding	chr9	+	33039903
0.875116	0.0893321	no_significant_change	ENSG00000086061	DNAJA1	protein_coding	chr9	+	33039955
0.039079	0.840697	sig_UP_in_Aniso	ENSG00000086061	DNAJA1	protein_coding	chr9	+	33077538
0.0466775	-0.148403	sig_DOWN_in_Aniso	ENSG00000086102	NFX1	protein_coding	chr9	+	33348728	0.373846	0.000169208	-0.0413493	0.788823
0.0191839	0.458695	sig_UP_in_Aniso	ENSG00000086102	NFX1	protein_coding	chr9	+	33370170
0.929706	0.03841	no_significant_change	ENSG00000086102	NFX1	protein_coding	chr9	+	33371154
0.817429	-0.288784	no_significant_change	ENSG00000086712	TXLNG	protein_coding	chrX	+	16856073	0.0632001	0.728361	0.526209	0.00907964
0.956635	0.128041	no_significant_change	ENSG00000086712	TXLNG	protein_coding	chrX	+	16860092
0.0965256	0.757236	sig_UP_in_Aniso	ENSG00000086712	TXLNG	protein_coding	chrX	+	16861351
0.911014	-0.0385665	no_significant_change	ENSG00000086712	TXLNG	protein_coding	chrX	+	16862640
0.218077	0.261002	no_significant_change	ENSG00000086848	ALG9	protein_coding	chr11	-	111652918	-0.00770995	0.959545	0.00512356	0.992466
0.090763	-0.0851672	sig_DOWN_in_Aniso	ENSG00000086848	ALG9	protein_coding	chr11	-	111657008
0.000186291	0.228753	sig_UP_in_Aniso	ENSG00000089006	SNX5	protein_coding	chr20	-	17922244	1.16834	3.34e-17	0.329729	0.0152904
0.783282	-0.0697362	no_significant_change	ENSG00000089006	SNX5	protein_coding	chr20	-	17947568
0.379701	-0.218547	no_significant_change	ENSG00000089006	SNX5	protein_coding	chr20	-	17948014
0.00826135	-0.144599	sig_DOWN_in_Aniso	ENSG00000089006	SNX5	protein_coding	chr20	-	17948344
0.0280325	0.279528	sig_UP_in_Aniso	ENSG00000091127	PUS7	protein_coding	chr7	-	105096949	0.330501	0.00628559	-0.447352	0.0116112
0.766116	-0.197489	no_significant_change	ENSG00000091127	PUS7	protein_coding	chr7	-	105112487
0.333631	-0.448243	no_significant_change	ENSG00000091127	PUS7	protein_coding	chr7	-	105138980
0.999592	-0.0300502	no_significant_change	ENSG00000091127	PUS7	protein_coding	chr7	-	105148723
0.999592	0.011309	no_significant_change	ENSG00000092421	SEMA6A	protein_coding	chr5	-	115779250	0.26712	0.00077455	0.407584	0.0174852
0.897171	0.130731	no_significant_change	ENSG00000092421	SEMA6A	protein_coding	chr5	-	115781444
0.836467	0.285844	no_significant_change	ENSG00000092421	SEMA6A	protein_coding	chr5	-	115781498
0.0570453	-0.606307	sig_DOWN_in_Aniso	ENSG00000092421	SEMA6A	protein_coding	chr5	-	115822352
0.982718	0.146971	no_significant_change	ENSG00000092421	SEMA6A	protein_coding	chr5	-	115900641
0.039493	0.0658915	sig_UP_in_Aniso	ENSG00000095139	ARCN1	protein_coding	chr11	+	118473642	-0.284382	7.05e-07	0.122694	0.339358
0.142041	-0.398314	no_significant_change	ENSG00000095139	ARCN1	protein_coding	chr11	+	118473745
0.928095	-0.367988	no_significant_change	ENSG00000099622	CIRBP	protein_coding	chr19	+	1272540	0.0435896	0.626774	0.12877	0.617758
1.84735e-05	-0.107673	sig_DOWN_in_Aniso	ENSG00000099622	CIRBP	protein_coding	chr19	+	1273169
3.51516e-08	0.497231	sig_UP_in_Aniso	ENSG00000099622	CIRBP	protein_coding	chr19	+	1274804
0.0651946	-0.77491	sig_DOWN_in_Aniso	ENSG00000099991	CABIN1	protein_coding	chr22	+	24471969	0.0549932	0.633372	0.129774	0.446397
0.00370807	0.0760521	sig_UP_in_Aniso	ENSG00000099991	CABIN1	protein_coding	chr22	+	24574596
0.603155	-0.361641	no_significant_change	ENSG00000099995	SF3A1	protein_coding	chr22	-	30727985	not detected		not detected
0.947662	0.00731292	no_significant_change	ENSG00000099995	SF3A1	protein_coding	chr22	-	30729707
0.859567	0.0608529	no_significant_change	ENSG00000099995	SF3A1	protein_coding	chr22	-	30730168
0.0753977	-0.854754	sig_DOWN_in_Aniso	ENSG00000099995	SF3A1	protein_coding	chr22	-	30738293
0.997295	-0.0435948	no_significant_change	ENSG00000100142	POLR2F	protein_coding	chr22	+	38363483	-0.520155	1.37e-06	-0.49716	0.0018509
0.998699	0.00102632	no_significant_change	ENSG00000100142	POLR2F	protein_coding	chr22	+	38363806
0.998637	0.0214457	no_significant_change	ENSG00000100142	POLR2F	protein_coding	chr22	+	38363862
0.676934	-0.236053	no_significant_change	ENSG00000100142	POLR2F	protein_coding	chr22	+	38365318
0.0867816	0.882245	sig_UP_in_Aniso	ENSG00000100142	POLR2F	protein_coding	chr22	+	38437920
0.17284	-0.363043	no_significant_change	ENSG00000100241	SBF1	protein_coding	chr22	-	50882763	-0.974764	3.55e-09	-0.930953	8.27e-07
0.642162	-0.213317	no_significant_change	ENSG00000100241	SBF1	protein_coding	chr22	-	50883431
0.043622	0.143161	sig_UP_in_Aniso	ENSG00000100241	SBF1	protein_coding	chr22	-	50885234
0.107738	-0.221245	no_significant_change	ENSG00000100320	RBFOX2	protein_coding	chr22	-	36134782	-0.095385	0.229447	-0.423919	0.0042764
0.866973	-0.0897972	no_significant_change	ENSG00000100320	RBFOX2	protein_coding	chr22	-	36138454
0.00027379	1.62755	sig_UP_in_Aniso	ENSG00000100320	RBFOX2	protein_coding	chr22	-	36240724
0.102047	0.662026	no_significant_change	ENSG00000100814	CCNB1IP1	protein_coding	chr14	-	20776339	0.468791	1.4e-13	0.316752	0.00673099
0.0113282	-0.0562854	sig_DOWN_in_Aniso	ENSG00000100814	CCNB1IP1	protein_coding	chr14	-	20779528
0.00430638	-0.230866	sig_DOWN_in_Aniso	ENSG00000101126	ADNP	protein_coding	chr20	-	49505585	0.237773	4.9e-06	0.23849	0.13911
0.00209208	0.148419	sig_UP_in_Aniso	ENSG00000101126	ADNP	protein_coding	chr20	-	49506881
0.0354969	0.160726	sig_UP_in_Aniso	ENSG00000101144	BMP7	protein_coding	chr20	-	55743807	0.0308706	0.783332	-1.95641	8.39e-38
0.0245165	-0.107534	sig_DOWN_in_Aniso	ENSG00000101144	BMP7	protein_coding	chr20	-	55745553
0.998637	-0.0129066	no_significant_change	ENSG00000101294	HM13	protein_coding	chr20	+	30157345	-0.0585487	0.590119	-0.285966	0.0295459
0.981037	-0.0838835	no_significant_change	ENSG00000101294	HM13	protein_coding	chr20	+	30157417
0.0929509	0.976928	sig_UP_in_Aniso	ENSG00000101294	HM13	protein_coding	chr20	+	30158270
0.00196733	0.51658	sig_UP_in_Aniso	ENSG00000101624	CEP76	protein_coding	chr18	-	12672879	not detected		not detected
0.00324878	-0.629416	sig_DOWN_in_Aniso	ENSG00000101624	CEP76	protein_coding	chr18	-	12698941
4.04825e-08	1.26139	sig_UP_in_Aniso	ENSG00000102786	INTS6	protein_coding	chr13	-	51927999	1.63111	7.65e-48	0.96387	7.22e-07
0.186433	-0.249276	no_significant_change	ENSG00000102786	INTS6	protein_coding	chr13	-	51936801
0.984551	0.0269913	no_significant_change	ENSG00000102786	INTS6	protein_coding	chr13	-	51939362
0.27928	-0.42583	no_significant_change	ENSG00000102786	INTS6	protein_coding	chr13	-	52024360
0.00212031	0.142683	sig_UP_in_Aniso	ENSG00000103091	WDR59	protein_coding	chr16	-	74907497	0.733782	3.21e-24	-0.779297	3.09e-08
0.0112487	-0.355117	sig_DOWN_in_Aniso	ENSG00000103091	WDR59	protein_coding	chr16	-	74946014
0.000873295	1.47083	sig_UP_in_Aniso	ENSG00000103148	NPRL3	protein_coding	chr16	-	129384	-0.339841	0.0314425	-0.926224	2.55e-11
0.91131	0.0433541	no_significant_change	ENSG00000103148	NPRL3	protein_coding	chr16	-	134271
0.945513	-0.207622	no_significant_change	ENSG00000103148	NPRL3	protein_coding	chr16	-	135746
0.676934	-0.0827773	no_significant_change	ENSG00000103148	NPRL3	protein_coding	chr16	-	135804
0.756802	0.157196	no_significant_change	ENSG00000103549	RNF40	protein_coding	chr16	+	30786484	0.100667	0.171302	0.0386213	0.81861
0.929706	0.0413086	no_significant_change	ENSG00000103549	RNF40	protein_coding	chr16	+	30786536
0.0309263	-0.309778	sig_DOWN_in_Aniso	ENSG00000103549	RNF40	protein_coding	chr16	+	30787621
0.0217892	-0.33382	sig_DOWN_in_Aniso	ENSG00000104059	FAM189A1	protein_coding	chr15	-	29412455	-0.266897	0.00024785	-0.951902	6.76e-10
0.0217892	0.52458	sig_UP_in_Aniso	ENSG00000104059	FAM189A1	protein_coding	chr15	-	29741820
0.00391832	-0.559288	sig_DOWN_in_Aniso	ENSG00000104447	TRPS1	protein_coding	chr8	-	116420727	0.732793	4.09e-24	0.0765073	0.701141
0.053492	0.29325	sig_UP_in_Aniso	ENSG00000104447	TRPS1	protein_coding	chr8	-	116423886
0.889382	0.271924	no_significant_change	ENSG00000104447	TRPS1	protein_coding	chr8	-	116424008
0.000113817	-0.155399	sig_DOWN_in_Aniso	ENSG00000104725	NEFL	ncRNA	chr8	-	24808469	0.394895	1.71e-05	1.00573	6.93e-06
0.25268	-0.196593	no_significant_change	ENSG00000104725	NEFL	ncRNA	chr8	-	24808940
2.03935e-06	0.236686	sig_UP_in_Aniso	ENSG00000104725	NEFL	ncRNA	chr8	-	24809887
0.712187	-0.137876	no_significant_change	ENSG00000104725	NEFL	ncRNA	chr8	-	24810008
0.0892799	0.164025	sig_UP_in_Aniso	ENSG00000105011	ASF1B	protein_coding	chr19	-	14230347	0.556517	4.03e-18	0.617241	0.000686869
0.0892799	-0.53358	sig_DOWN_in_Aniso	ENSG00000105011	ASF1B	protein_coding	chr19	-	14231617
0.00951792	0.436477	sig_UP_in_Aniso	ENSG00000105376	ICAM5	protein_coding	chr19	+	10407452	1.54514	8.94e-18	1.08656	3.1e-06
0.00951792	-0.500343	sig_DOWN_in_Aniso	ENSG00000105376	ICAM5	protein_coding	chr19	+	10446923
4.83506e-13	2.44175	sig_UP_in_Aniso	ENSG00000105402	NAPA	protein_coding	chr19	-	47987786	-0.259482	0.0124848	0.231214	0.118239
3.87576e-20	-0.117406	sig_DOWN_in_Aniso	ENSG00000105402	NAPA	protein_coding	chr19	-	47990893
0.0868166	-0.109559	sig_DOWN_in_Aniso	ENSG00000105429	MEGF8	protein_coding	chr19	+	42882913	-1.05283	3.62e-13	-0.592375	0.000185901
0.100782	0.137102	no_significant_change	ENSG00000105429	MEGF8	protein_coding	chr19	+	42912592
0.080198	0.325811	sig_UP_in_Aniso	ENSG00000105483	CARD8	protein_coding	chr19	-	48712907	0.0314579	0.739366	-0.167719	0.417481
0.0967013	-0.369125	sig_DOWN_in_Aniso	ENSG00000105483	CARD8	protein_coding	chr19	-	48741590
5.26882e-11	0.0938457	sig_UP_in_Aniso	ENSG00000105576	TNPO2	protein_coding	chr19	-	12810015	0.950015	5.37e-39	-0.918162	1.21e-06
5.16732e-06	-1.39001	sig_DOWN_in_Aniso	ENSG00000105576	TNPO2	protein_coding	chr19	-	12820475
0.998699	0.0184997	no_significant_change	ENSG00000105778	AVL9	protein_coding	chr7	+	32623784	0.123987	0.0727084	-0.442501	0.00111268
0.982718	0.0986235	no_significant_change	ENSG00000105778	AVL9	protein_coding	chr7	+	32625776
0.940735	0.0784079	no_significant_change	ENSG00000105778	AVL9	protein_coding	chr7	+	32628321
0.24062	-0.315937	no_significant_change	ENSG00000105778	AVL9	protein_coding	chr7	+	32795025
0.99822	-0.0445246	no_significant_change	ENSG00000105778	AVL9	protein_coding	chr7	+	32798961
0.0946926	0.868333	sig_UP_in_Aniso	ENSG00000105778	AVL9	protein_coding	chr7	+	32878314
0.0730106	-0.2672	sig_DOWN_in_Aniso	ENSG00000105939	ZC3HAV1	protein_coding	chr7	-	138728266	-1.95842	1.44e-148	-1.26477	6.6e-12
0.0730106	0.284989	sig_UP_in_Aniso	ENSG00000105939	ZC3HAV1	protein_coding	chr7	-	138745086
0.875268	-0.226714	no_significant_change	ENSG00000105983	LMBR1	protein_coding	chr7	-	156470533	-0.648475	8.29e-19	0.539	0.000447579
0.34476	-0.450091	no_significant_change	ENSG00000105983	LMBR1	protein_coding	chr7	-	156472628
0.431679	-0.200147	no_significant_change	ENSG00000105983	LMBR1	protein_coding	chr7	-	156475124
0.0703131	0.17998	sig_UP_in_Aniso	ENSG00000105983	LMBR1	protein_coding	chr7	-	156475632
0.998637	0.111119	no_significant_change	ENSG00000105983	LMBR1	protein_coding	chr7	-	156475869
0.00136359	-0.0878629	sig_DOWN_in_Aniso	ENSG00000106004	HOXA5	protein_coding	chr7	-	27180675	not detected		not detected
0.0215061	1.35952	sig_UP_in_Aniso	ENSG00000106004	HOXA5	protein_coding	chr7	-	27181014
0.0133368	-0.847341	sig_DOWN_in_Aniso	ENSG00000106144	CASP2	protein_coding	chr7	+	142993826	-0.00580609	0.958624	-0.283964	0.0546963
0.978144	0.00240922	no_significant_change	ENSG00000106144	CASP2	protein_coding	chr7	+	143004493
0.316576	0.069778	no_significant_change	ENSG00000106144	CASP2	protein_coding	chr7	+	143004788
0.439104	0.229634	no_significant_change	ENSG00000106603	COA1	protein_coding	chr7	-	43648055	-0.274603	0.00178287	-0.0087397	0.948751
0.051241	0.291363	sig_UP_in_Aniso	ENSG00000106603	COA1	protein_coding	chr7	-	43663964
0.110579	0.329948	no_significant_change	ENSG00000106603	COA1	protein_coding	chr7	-	43667208
0.369093	0.40873	no_significant_change	ENSG00000106603	COA1	protein_coding	chr7	-	43670749
0.000765188	-0.2136	sig_DOWN_in_Aniso	ENSG00000106603	COA1	protein_coding	chr7	-	43678854
0.0738631	-0.435962	sig_DOWN_in_Aniso	ENSG00000107902	LHPP	protein_coding	chr10	+	126187083	-0.347858	0.000450788	-1.14717	5.11e-16
0.431236	0.5368	no_significant_change	ENSG00000107902	LHPP	protein_coding	chr10	+	126205942
0.666118	0.0848549	no_significant_change	ENSG00000107902	LHPP	protein_coding	chr10	+	126302709
0.00023616	-0.595267	sig_DOWN_in_Aniso	ENSG00000108256	NUFIP2	protein_coding	chr17	-	27582857	0.632226	1.62e-07	0.835872	3.29e-05
0.178515	-0.325988	no_significant_change	ENSG00000108256	NUFIP2	protein_coding	chr17	-	27584182
0.376402	-0.466686	no_significant_change	ENSG00000108256	NUFIP2	protein_coding	chr17	-	27584359
0.57023	-0.187783	no_significant_change	ENSG00000108256	NUFIP2	protein_coding	chr17	-	27584550
0.0517791	0.19152	sig_UP_in_Aniso	ENSG00000108256	NUFIP2	protein_coding	chr17	-	27588644
0.182095	1.04128	no_significant_change	ENSG00000108256	NUFIP2	protein_coding	chr17	-	27589352
0.246767	0.346541	no_significant_change	ENSG00000108256	NUFIP2	protein_coding	chr17	-	27590213
0.639937	0.523928	no_significant_change	ENSG00000108256	NUFIP2	protein_coding	chr17	-	27590447
0.474119	0.242747	no_significant_change	ENSG00000108256	NUFIP2	protein_coding	chr17	-	27590649
0.077569	-0.667058	sig_DOWN_in_Aniso	ENSG00000108557	RAI1	protein_coding	chr17	+	17657994	0.0839158	0.650271	-1.54474	4.65e-19
0.016897	0.230647	sig_UP_in_Aniso	ENSG00000108557	RAI1	protein_coding	chr17	+	17714763
0.0790519	0.0962377	sig_UP_in_Aniso	ENSG00000108592	FTSJ3	protein_coding	chr17	-	61896793	-0.0101922	0.913501	0.263616	0.227642
0.148168	-0.617576	no_significant_change	ENSG00000108592	FTSJ3	protein_coding	chr17	-	61899949
0.000140987	0.405404	sig_UP_in_Aniso	ENSG00000109920	FNBP4	protein_coding	chr11	-	47738068	1.73025	3.17e-29	-0.0761908	0.628724
0.000140987	-0.841635	sig_DOWN_in_Aniso	ENSG00000109920	FNBP4	protein_coding	chr11	-	47765464
5.62919e-07	-0.746616	sig_DOWN_in_Aniso	ENSG00000111203	ITFG2	protein_coding	chr12	+	2934106	0.754175	7.66e-22	-0.153198	0.365493
5.67298e-08	0.632529	sig_UP_in_Aniso	ENSG00000111203	ITFG2	protein_coding	chr12	+	2968956
0.703697	0.391272	no_significant_change	ENSG00000111300	NAA25	protein_coding	chr12	-	112456607	0.53541	3.88e-09	-0.386031	0.00693877
0.998699	0.0240824	no_significant_change	ENSG00000111300	NAA25	protein_coding	chr12	-	112464492
0.99707	0.044727	no_significant_change	ENSG00000111300	NAA25	protein_coding	chr12	-	112464642
0.998699	0.0293558	no_significant_change	ENSG00000111300	NAA25	protein_coding	chr12	-	112464695
0.929706	0.194777	no_significant_change	ENSG00000111300	NAA25	protein_coding	chr12	-	112465079
0.928095	0.179783	no_significant_change	ENSG00000111300	NAA25	protein_coding	chr12	-	112465196
0.999592	0.00363193	no_significant_change	ENSG00000111300	NAA25	protein_coding	chr12	-	112465587
0.998699	0.00745004	no_significant_change	ENSG00000111300	NAA25	protein_coding	chr12	-	112477064
0.00220042	-0.932537	sig_DOWN_in_Aniso	ENSG00000111300	NAA25	protein_coding	chr12	-	112516135
0.993928	-0.185676	no_significant_change	ENSG00000111445	RFC5	protein_coding	chr12	+	118469500	-0.096242	0.165153	0.416018	0.00104672
0.995922	-0.166152	no_significant_change	ENSG00000111445	RFC5	protein_coding	chr12	+	118469922
3.02996e-05	-0.35982	sig_DOWN_in_Aniso	ENSG00000111445	RFC5	protein_coding	chr12	+	118470038
0.00266242	0.711279	sig_UP_in_Aniso	ENSG00000111445	RFC5	protein_coding	chr12	+	118470872
0.0564658	0.870892	sig_UP_in_Aniso	ENSG00000111445	RFC5	protein_coding	chr12	+	118472356
5.68607e-13	0.938511	sig_UP_in_Aniso	ENSG00000111445	RFC5	protein_coding	chr12	+	118479252
0.00643746	0.088962	sig_UP_in_Aniso	ENSG00000111641	NOP2	protein_coding	chr12	-	6666035	-0.168771	0.0103435	-0.633207	0.00112909
0.0380621	-0.819075	sig_DOWN_in_Aniso	ENSG00000111641	NOP2	protein_coding	chr12	-	6673919
0.0705568	-0.260727	sig_DOWN_in_Aniso	ENSG00000111790	FGFR1OP2	protein_coding	chr12	+	27113677	0.15324	0.172358	0.537195	0.00245853
0.116793	0.279192	no_significant_change	ENSG00000111790	FGFR1OP2	protein_coding	chr12	+	27118943
0.986238	0.0298098	no_significant_change	ENSG00000111790	FGFR1OP2	protein_coding	chr12	+	27119581
0.0300441	0.66873	sig_UP_in_Aniso	ENSG00000112306	RPS12	protein_coding	chr6	+	133138486	-0.37249	2.04e-07	0.288926	0.10736
0.000819934	-0.0448543	sig_DOWN_in_Aniso	ENSG00000112306	RPS12	protein_coding	chr6	+	133138706
0.999592	-0.196472	no_significant_change	ENSG00000112739	PRPF4B	protein_coding	chr6	+	4061138	-0.0137787	0.960487	0.116324	0.444723
2.50979e-07	-0.192268	sig_DOWN_in_Aniso	ENSG00000112739	PRPF4B	protein_coding	chr6	+	4062139
7.45279e-08	0.444699	sig_UP_in_Aniso	ENSG00000112739	PRPF4B	protein_coding	chr6	+	4065216
0.984551	0.00220375	no_significant_change	ENSG00000112787	FBRSL1	protein_coding	chr12	+	133088540	0.222998	0.365088	-0.461011	0.000926895
3.02996e-05	-1.22985	sig_DOWN_in_Aniso	ENSG00000112787	FBRSL1	protein_coding	chr12	+	133142992
0.671576	0.0988679	no_significant_change	ENSG00000112787	FBRSL1	protein_coding	chr12	+	133160878
0.999592	0.0644934	no_significant_change	ENSG00000112787	FBRSL1	protein_coding	chr12	+	133161771
0.0622477	-0.341709	sig_DOWN_in_Aniso	ENSG00000114251	WNT5A	protein_coding	chr3	-	55499742	-1.19048	1.03e-49	-0.652387	3.86e-05
0.0622477	0.229127	sig_UP_in_Aniso	ENSG00000114251	WNT5A	protein_coding	chr3	-	55501613
0.0341592	-0.574443	sig_DOWN_in_Aniso	ENSG00000114853	ZBTB47	protein_coding	chr3	+	42707643	-1.20039	2.19e-23	-2.29994	3.01e-19
0.00789534	0.243716	sig_UP_in_Aniso	ENSG00000114853	ZBTB47	protein_coding	chr3	+	42709072
0.0347487	-0.125722	sig_DOWN_in_Aniso	ENSG00000115042	FAHD2A	protein_coding	chr2	+	96078878	0.439725	5.39e-08	-0.321968	0.0397193
0.0646776	0.549254	sig_UP_in_Aniso	ENSG00000115042	FAHD2A	protein_coding	chr2	+	96082355
0.234281	-0.512204	no_significant_change	ENSG00000115459	ELMOD3	protein_coding	chr2	+	85586080	0.93431	2.68e-24	-1.67868	1.34e-19
0.0928002	0.155197	sig_UP_in_Aniso	ENSG00000115459	ELMOD3	protein_coding	chr2	+	85618869
0.000362062	0.716098	sig_UP_in_Aniso	ENSG00000115657	ABCB6	protein_coding	chr2	-	220065078	not detected		not detected
0.000362062	-0.290066	sig_DOWN_in_Aniso	ENSG00000115657	ABCB6	protein_coding	chr2	-	220074492
0.00265385	0.266543	sig_UP_in_Aniso	ENSG00000115844	DLX2	protein_coding	chr2	-	172962927	1.61178	7.95e-22	1.01333	4.6e-05
0.971878	0.129302	no_significant_change	ENSG00000115844	DLX2	protein_coding	chr2	-	172963003
0.0768814	-0.656452	sig_DOWN_in_Aniso	ENSG00000115844	DLX2	protein_coding	chr2	-	172964449
0.00345648	0.0638881	sig_UP_in_Aniso	ENSG00000115970	THADA	protein_coding	chr2	-	43457989	0.687956	4.21e-17	0.236736	0.089801
0.0753977	-0.79105	sig_DOWN_in_Aniso	ENSG00000115970	THADA	protein_coding	chr2	-	43779214
0.0329333	-0.929632	sig_DOWN_in_Aniso	ENSG00000116035	VAX2	protein_coding	chr2	+	71135768	-0.548663	1.4e-08	-0.024385	0.885746
0.0329333	0.631488	sig_UP_in_Aniso	ENSG00000116035	VAX2	protein_coding	chr2	+	71160573
0.0705568	-0.224863	sig_DOWN_in_Aniso	ENSG00000116106	EPHA4	protein_coding	chr2	-	222282747	1.37602	1.12e-49	0.407555	0.00451757
0.0859905	0.392659	sig_UP_in_Aniso	ENSG00000116106	EPHA4	protein_coding	chr2	-	222284736
0.0714894	-0.273712	sig_DOWN_in_Aniso	ENSG00000116141	MARK1	protein_coding	chr1	+	220756239	0.235075	0.00963188	0.103802	0.458409
0.178515	0.35482	no_significant_change	ENSG00000116141	MARK1	protein_coding	chr1	+	220835791
0.998699	0.0302784	no_significant_change	ENSG00000116141	MARK1	protein_coding	chr1	+	220837272
0.00608079	0.0671975	sig_UP_in_Aniso	ENSG00000116260	QSOX1	protein_coding	chr1	+	180167167	0.0385889	0.659347	0.893079	2.13e-06
0.0702764	-0.570748	sig_DOWN_in_Aniso	ENSG00000116260	QSOX1	protein_coding	chr1	+	180169429
0.000285196	0.389834	sig_UP_in_Aniso	ENSG00000116560	SFPQ	protein_coding	chr1	-	35641980	0.273333	0.0104588	0.62908	0.00439303
0.954683	-0.108913	no_significant_change	ENSG00000116560	SFPQ	protein_coding	chr1	-	35648444
0.528777	-0.145607	no_significant_change	ENSG00000116560	SFPQ	protein_coding	chr1	-	35648535
0.00103335	-0.0200684	sig_DOWN_in_Aniso	ENSG00000116560	SFPQ	protein_coding	chr1	-	35649201
0.483709	-0.118476	no_significant_change	ENSG00000116560	SFPQ	protein_coding	chr1	-	35649355
0.740539	-0.271441	no_significant_change	ENSG00000116560	SFPQ	protein_coding	chr1	-	35649708
0.998699	0.0848647	no_significant_change	ENSG00000116560	SFPQ	protein_coding	chr1	-	35653613
0.99707	-0.00353185	no_significant_change	ENSG00000116560	SFPQ	protein_coding	chr1	-	35654600
0.996337	-0.0379724	no_significant_change	ENSG00000116641	DOCK7	protein_coding	chr1	-	62920682	0.0831994	0.385901	-0.811004	3.25e-09
0.000578218	1.95353	sig_UP_in_Aniso	ENSG00000116641	DOCK7	protein_coding	chr1	-	63101429
0.980126	-0.114841	no_significant_change	ENSG00000116641	DOCK7	protein_coding	chr1	-	63152868
0.9335	-0.112163	no_significant_change	ENSG00000116641	DOCK7	protein_coding	chr1	-	63152950
0.7321	0.140104	no_significant_change	ENSG00000116679	IVNS1ABP	protein_coding	chr1	-	185265522	0.504655	6.05e-06	-0.372537	0.00671772
0.437519	0.161331	no_significant_change	ENSG00000116679	IVNS1ABP	protein_coding	chr1	-	185266042
0.998637	-0.0550928	no_significant_change	ENSG00000116679	IVNS1ABP	protein_coding	chr1	-	185266664
0.76694	-0.0532814	no_significant_change	ENSG00000116679	IVNS1ABP	protein_coding	chr1	-	185266896
0.0836672	-0.485997	sig_DOWN_in_Aniso	ENSG00000116679	IVNS1ABP	protein_coding	chr1	-	185274125
0.0983472	0.456218	sig_UP_in_Aniso	ENSG00000116731	PRDM2	protein_coding	chr1	+	14114338	1.31243	2.95e-20	0.744865	0.000252937
0.985053	-0.0241818	no_significant_change	ENSG00000116731	PRDM2	protein_coding	chr1	+	14114580
0.349012	-0.280696	no_significant_change	ENSG00000116731	PRDM2	protein_coding	chr1	+	14151569
0.00852104	-0.455283	sig_DOWN_in_Aniso	ENSG00000116903	EXOC8	protein_coding	chr1	-	231464486	0.891062	3.23e-17	NA	1
0.350935	0.10728	no_significant_change	ENSG00000116903	EXOC8	protein_coding	chr1	-	231468498
0.998699	0.099447	no_significant_change	ENSG00000116903	EXOC8	protein_coding	chr1	-	231468804
0.889382	-0.109715	no_significant_change	ENSG00000116903	EXOC8	protein_coding	chr1	-	231468856
0.998637	0.130949	no_significant_change	ENSG00000116903	EXOC8	protein_coding	chr1	-	231470329
0.0512871	-0.857341	sig_DOWN_in_Aniso	ENSG00000117408	IPO13	protein_coding	chr1	+	44416026	0.240896	0.00032342	0.0549181	0.713076
0.996687	0.0745357	no_significant_change	ENSG00000117408	IPO13	protein_coding	chr1	+	44425154
0.999592	0.0306725	no_significant_change	ENSG00000117408	IPO13	protein_coding	chr1	+	44433424
0.957241	0.048776	no_significant_change	ENSG00000117408	IPO13	protein_coding	chr1	+	44433693
0.0943284	0.204829	sig_UP_in_Aniso	ENSG00000117533	VAMP4	protein_coding	chr1	-	171669303	0.186571	0.0301161	-0.83922	9.57e-06
0.186041	-0.427211	no_significant_change	ENSG00000117533	VAMP4	protein_coding	chr1	-	171672940
0.993928	0.0103442	no_significant_change	ENSG00000118689	FOXO3	protein_coding	chr6	+	108960891	1.27303	3.28e-189	1.10489	1.83e-07
0.998699	-0.0513482	no_significant_change	ENSG00000118689	FOXO3	protein_coding	chr6	+	109001954
0.978144	-0.280429	no_significant_change	ENSG00000118689	FOXO3	protein_coding	chr6	+	109005976
0.0600146	1.28154	sig_UP_in_Aniso	ENSG00000118689	FOXO3	protein_coding	chr6	+	109070182
0.00855232	-0.157023	sig_DOWN_in_Aniso	ENSG00000118985	ELL2	protein_coding	chr5	-	95220802	1.02715	2.66e-26	1.18226	8.54e-06
0.00345648	0.252257	sig_UP_in_Aniso	ENSG00000118985	ELL2	protein_coding	chr5	-	95223088
0.992144	-0.10779	no_significant_change	ENSG00000118985	ELL2	protein_coding	chr5	-	95223250
0.218535	0.112537	no_significant_change	ENSG00000120029	C10orf76	protein_coding	chr10	-	103605360	0.309846	1.14e-06	-1.07783	4.33e-16
0.999592	0.0727328	no_significant_change	ENSG00000120029	C10orf76	protein_coding	chr10	-	103606185
0.0212791	-0.493645	sig_DOWN_in_Aniso	ENSG00000120029	C10orf76	protein_coding	chr10	-	103789206
0.000821439	-0.169992	sig_DOWN_in_Aniso	ENSG00000120314	WDR55	protein_coding	chr5	+	140051929	0.465419	1.28e-11	0.256079	0.1543
0.00555907	0.425183	sig_UP_in_Aniso	ENSG00000120314	WDR55	protein_coding	chr5	+	140053706
0.982718	0.0427896	no_significant_change	ENSG00000120616	EPC1	protein_coding	chr10	-	32556679	1.88474	6.76e-67	0.659786	4.94e-05
0.946233	0.100732	no_significant_change	ENSG00000120616	EPC1	protein_coding	chr10	-	32557496
0.0983655	-0.526967	sig_DOWN_in_Aniso	ENSG00000120616	EPC1	protein_coding	chr10	-	32634303
7.05025e-14	2.92569	sig_UP_in_Aniso	ENSG00000120705	ETF1	protein_coding	chr5	-	137804489	-0.134722	0.0314294	0.424811	0.0017529
0.178515	-0.118186	no_significant_change	ENSG00000120705	ETF1	protein_coding	chr5	-	137841783
0.998637	0.00888946	no_significant_change	ENSG00000120705	ETF1	protein_coding	chr5	-	137842980
0.998637	-0.0205287	no_significant_change	ENSG00000120705	ETF1	protein_coding	chr5	-	137843125
0.999208	-0.0368636	no_significant_change	ENSG00000120705	ETF1	protein_coding	chr5	-	137843476
0.985231	-0.149652	no_significant_change	ENSG00000120705	ETF1	protein_coding	chr5	-	137843532
0.971054	-0.244372	no_significant_change	ENSG00000120705	ETF1	protein_coding	chr5	-	137843596
0.0172713	-0.313679	sig_DOWN_in_Aniso	ENSG00000120948	TARDBP	protein_coding	chr1	+	11084098	-0.665448	2.9e-19	0.348875	0.118239
0.939335	-0.0599966	no_significant_change	ENSG00000120948	TARDBP	protein_coding	chr1	+	11084240
0.549863	-0.309932	no_significant_change	ENSG00000120948	TARDBP	protein_coding	chr1	+	11085548
8.67454e-05	0.65331	sig_UP_in_Aniso	ENSG00000120948	TARDBP	protein_coding	chr1	+	11090584
0.241543	0.169746	no_significant_change	ENSG00000121390	PSPC1	protein_coding	chr13	-	20248894	0.182135	0.202026	0.665874	1.15e-05
0.47692	0.221928	no_significant_change	ENSG00000121390	PSPC1	protein_coding	chr13	-	20249528
0.0217892	-0.20352	sig_DOWN_in_Aniso	ENSG00000121390	PSPC1	protein_coding	chr13	-	20277009
0.04063	-0.993363	sig_DOWN_in_Aniso	ENSG00000121579	NAA50	protein_coding	chr3	-	113435253	-0.595214	8.97e-19	-0.402813	0.000550009
0.337776	-0.344716	no_significant_change	ENSG00000121579	NAA50	protein_coding	chr3	-	113435306
0.906834	0.141955	no_significant_change	ENSG00000121579	NAA50	protein_coding	chr3	-	113437687
0.998637	0.0513509	no_significant_change	ENSG00000121579	NAA50	protein_coding	chr3	-	113437783
0.929706	0.139121	no_significant_change	ENSG00000121579	NAA50	protein_coding	chr3	-	113437835
0.972437	0.128927	no_significant_change	ENSG00000121579	NAA50	protein_coding	chr3	-	113440416
0.998637	0.0580252	no_significant_change	ENSG00000121579	NAA50	protein_coding	chr3	-	113440534
0.610406	-0.697826	no_significant_change	ENSG00000121774	KHDRBS1	protein_coding	chr1	+	32509423	-0.300716	1.32e-06	-0.0847785	0.593047
0.000343826	-0.120023	sig_DOWN_in_Aniso	ENSG00000121774	KHDRBS1	protein_coding	chr1	+	32509475
3.24714e-08	0.695366	sig_UP_in_Aniso	ENSG00000121774	KHDRBS1	protein_coding	chr1	+	32526450
0.937843	0.073245	no_significant_change	ENSG00000122085	MTERFD2	protein_coding	chr2	-	242014962	-0.826144	4.04e-25	0.149852	0.325565
0.274765	0.535745	no_significant_change	ENSG00000122085	MTERFD2	protein_coding	chr2	-	242026512
0.566769	0.307203	no_significant_change	ENSG00000122085	MTERFD2	protein_coding	chr2	-	242026566
0.703663	0.347861	no_significant_change	ENSG00000122085	MTERFD2	protein_coding	chr2	-	242026638
0.628095	-0.287223	no_significant_change	ENSG00000122085	MTERFD2	protein_coding	chr2	-	242028584
0.0538628	-0.286556	sig_DOWN_in_Aniso	ENSG00000122085	MTERFD2	protein_coding	chr2	-	242034980
0.000703738	0.410335	sig_UP_in_Aniso	ENSG00000122566	HNRNPA2B1	protein_coding	chr7	-	26229546	-0.317215	0.0238807	0.400077	0.090146
2.44977e-06	0.334534	sig_UP_in_Aniso	ENSG00000122566	HNRNPA2B1	protein_coding	chr7	-	26229925
1.19719e-08	-0.134149	sig_DOWN_in_Aniso	ENSG00000122566	HNRNPA2B1	protein_coding	chr7	-	26231465
0.00330657	-0.205723	sig_DOWN_in_Aniso	ENSG00000122644	ARL4A	protein_coding	chr7	+	12728801	1.04558	6.03e-33	0.537867	0.0110491
0.314629	0.429727	no_significant_change	ENSG00000122644	ARL4A	protein_coding	chr7	+	12729757
0.0651946	0.485907	sig_UP_in_Aniso	ENSG00000122644	ARL4A	protein_coding	chr7	+	12730340
0.0514882	0.93075	sig_UP_in_Aniso	ENSG00000123600	METTL8	protein_coding	chr2	-	172101143	0.162943	0.202026	-0.379051	0.00459119
0.776701	-0.168041	no_significant_change	ENSG00000123600	METTL8	protein_coding	chr2	-	172176212
0.947662	-0.15857	no_significant_change	ENSG00000123600	METTL8	protein_coding	chr2	-	172177193
0.991788	0.0453574	no_significant_change	ENSG00000123600	METTL8	protein_coding	chr2	-	172178125
0.999592	-0.033681	no_significant_change	ENSG00000123600	METTL8	protein_coding	chr2	-	172180296
0.786864	-0.0904345	no_significant_change	ENSG00000123684	LPGAT1	protein_coding	chr1	-	211916798	-0.626158	1.32e-12	-0.519113	0.000116389
0.99501	-0.00385058	no_significant_change	ENSG00000123684	LPGAT1	protein_coding	chr1	-	211918327
0.998699	-0.0229658	no_significant_change	ENSG00000123684	LPGAT1	protein_coding	chr1	-	211920777
0.978572	0.045913	no_significant_change	ENSG00000123684	LPGAT1	protein_coding	chr1	-	211921431
0.0683668	0.894597	sig_UP_in_Aniso	ENSG00000123684	LPGAT1	protein_coding	chr1	-	211923137
4.83982e-16	-0.325778	sig_DOWN_in_Aniso	ENSG00000124120	TTPAL	protein_coding	chr20	+	43123242	-0.26329	0.00267297	0.187971	0.247677
6.65067e-13	1.14652	sig_UP_in_Aniso	ENSG00000124120	TTPAL	protein_coding	chr20	+	43146959
0.250846	0.511053	no_significant_change	ENSG00000124151	NCOA3	protein_coding	chr20	+	46282478	-0.160786	0.178473	0.858972	3.84e-08
0.0702829	-0.117028	sig_DOWN_in_Aniso	ENSG00000124151	NCOA3	protein_coding	chr20	+	46285612
0.424863	-0.137338	no_significant_change	ENSG00000124217	MOCS3	protein_coding	chr20	+	49577626	-0.387614	0.000345139	NA	1
0.0260755	0.482495	sig_UP_in_Aniso	ENSG00000124217	MOCS3	protein_coding	chr20	+	49578397
0.703697	-0.312002	no_significant_change	ENSG00000124217	MOCS3	protein_coding	chr20	+	49579862
0.0639654	0.572554	sig_UP_in_Aniso	ENSG00000124224	PPP4R1L	protein_coding	chr20	-	56803997	1.87214	5.98e-83	-0.719821	1.68e-08
0.0639654	-0.45082	sig_DOWN_in_Aniso	ENSG00000124224	PPP4R1L	protein_coding	chr20	-	56820801
0.077569	0.104197	sig_UP_in_Aniso	ENSG00000124243	BCAS4	protein_coding	chr20	+	49493713	-0.184318	0.266206	-0.0975931	0.528232
0.245459	-0.464175	no_significant_change	ENSG00000124243	BCAS4	protein_coding	chr20	+	49499206
0.119985	0.409066	no_significant_change	ENSG00000124302	CHST8	protein_coding	chr19	+	34115093	1.0898	8.7e-12	1.58549	0.000137495
0.0612395	1.54263	sig_UP_in_Aniso	ENSG00000124302	CHST8	protein_coding	chr19	+	34115402
0.24429	-0.60426	no_significant_change	ENSG00000124302	CHST8	protein_coding	chr19	+	34243616
0.608979	-0.0837837	no_significant_change	ENSG00000124302	CHST8	protein_coding	chr19	+	34264413
0.04989	-0.648197	sig_DOWN_in_Aniso	ENSG00000124613	ZNF391	protein_coding	chr6	+	27358908	0.425503	4.33e-07	-0.757001	8.43e-06
0.0101905	0.231631	sig_UP_in_Aniso	ENSG00000124613	ZNF391	protein_coding	chr6	+	27371686
0.99501	-0.0340603	no_significant_change	ENSG00000125266	EFNB2	protein_coding	chr13	-	107142078	2.50927	3.67e-226	1.11417	0.00894015
0.998637	-0.16816	no_significant_change	ENSG00000125266	EFNB2	protein_coding	chr13	-	107142353
0.649817	-0.139693	no_significant_change	ENSG00000125266	EFNB2	protein_coding	chr13	-	107142546
0.945513	-0.224126	no_significant_change	ENSG00000125266	EFNB2	protein_coding	chr13	-	107142811
0.0130413	1.29074	sig_UP_in_Aniso	ENSG00000125266	EFNB2	protein_coding	chr13	-	107158394
0.00944682	0.895077	sig_UP_in_Aniso	ENSG00000125266	EFNB2	protein_coding	chr13	-	107182960
4.03347e-10	0.979824	sig_UP_in_Aniso	ENSG00000125520	SLC2A4RG	protein_coding	chr20	+	62370456	-0.194799	0.333143	-0.935522	1.44e-05
0.0017354	-0.139935	sig_DOWN_in_Aniso	ENSG00000125520	SLC2A4RG	protein_coding	chr20	+	62374854
0.895852	-0.250115	no_significant_change	ENSG00000125520	SLC2A4RG	protein_coding	chr20	+	62375321
0.998637	-0.162924	no_significant_change	ENSG00000125520	SLC2A4RG	protein_coding	chr20	+	62375402
0.00471296	-0.637008	sig_DOWN_in_Aniso	ENSG00000125779	PANK2	protein_coding	chr20	+	3889266	0.884618	1.54e-25	0.221249	0.165882
0.0261514	-0.764465	sig_DOWN_in_Aniso	ENSG00000125779	PANK2	protein_coding	chr20	+	3899098
0.959862	-0.052049	no_significant_change	ENSG00000125779	PANK2	protein_coding	chr20	+	3904154
0.994396	-0.0445462	no_significant_change	ENSG00000125779	PANK2	protein_coding	chr20	+	3904206
0.947662	0.117696	no_significant_change	ENSG00000125779	PANK2	protein_coding	chr20	+	3904271
0.911014	0.0816226	no_significant_change	ENSG00000125779	PANK2	protein_coding	chr20	+	3904354
0.866973	0.11501	no_significant_change	ENSG00000125779	PANK2	protein_coding	chr20	+	3904441
0.957999	0.125491	no_significant_change	ENSG00000125779	PANK2	protein_coding	chr20	+	3904495
0.448016	0.486215	no_significant_change	ENSG00000125779	PANK2	protein_coding	chr20	+	3904555
0.653339	-0.222003	no_significant_change	ENSG00000125779	PANK2	protein_coding	chr20	+	3910532
0.0552918	0.0479216	sig_UP_in_Aniso	ENSG00000127191	TRAF2	protein_coding	chr9	+	139821059	0.18068	0.123749	-1.29246	2.74e-13
0.318285	-0.609597	no_significant_change	ENSG00000127191	TRAF2	protein_coding	chr9	+	139829277
0.224578	0.303207	no_significant_change	ENSG00000127483	HP1BP3	protein_coding	chr1	-	21069166	-0.141845	0.22317	0.112628	0.484757
0.998699	-0.0330533	no_significant_change	ENSG00000127483	HP1BP3	protein_coding	chr1	-	21069702
0.486642	0.252208	no_significant_change	ENSG00000127483	HP1BP3	protein_coding	chr1	-	21071136
0.0544356	-0.24135	sig_DOWN_in_Aniso	ENSG00000127483	HP1BP3	protein_coding	chr1	-	21080549
0.991788	0.0203047	no_significant_change	ENSG00000127483	HP1BP3	protein_coding	chr1	-	21103096
0.0159782	-0.373833	sig_DOWN_in_Aniso	ENSG00000127511	SIN3B	protein_coding	chr19	+	16967916	0.672064	1.54e-26	-0.664903	1.9e-06
0.0159782	0.283132	sig_UP_in_Aniso	ENSG00000127511	SIN3B	protein_coding	chr19	+	16991164
0.388316	-0.311106	no_significant_change	ENSG00000128245	YWHAH	protein_coding	chr22	+	32341230	0.674093	5.96e-57	1.13212	7.03e-07
0.577885	-0.264422	no_significant_change	ENSG00000128245	YWHAH	protein_coding	chr22	+	32341483
0.067087	0.0603372	sig_UP_in_Aniso	ENSG00000128245	YWHAH	protein_coding	chr22	+	32353584
0.0871317	-0.283626	sig_DOWN_in_Aniso	ENSG00000128346	C22orf23	protein_coding	chr22	-	38244186	-0.544593	7.59e-11	0.468595	0.0133257
0.153539	0.505674	no_significant_change	ENSG00000128346	C22orf23	protein_coding	chr22	-	38339739
0.0632677	0.0646238	sig_UP_in_Aniso	ENSG00000128567	PODXL	protein_coding	chr7	-	131185031	-0.39515	3.05e-06	0.31916	0.0220856
0.27193	-0.547989	no_significant_change	ENSG00000128567	PODXL	protein_coding	chr7	-	131188666
1.62056e-06	-0.578718	sig_DOWN_in_Aniso	ENSG00000128683	GAD1	protein_coding	chr2	+	171699268	1.69289	1.54e-33	0.666601	2.67e-05
2.44977e-06	0.709456	sig_UP_in_Aniso	ENSG00000128683	GAD1	protein_coding	chr2	+	171717657
0.863278	-0.0364452	no_significant_change	ENSG00000129351	ILF3	protein_coding	chr19	+	10796443	0.00651206	0.903454	-0.0132396	0.940389
0.827216	-0.29611	no_significant_change	ENSG00000129351	ILF3	protein_coding	chr19	+	10800322
0.646447	-0.188444	no_significant_change	ENSG00000129351	ILF3	protein_coding	chr19	+	10800377
0.415965	-0.0454865	no_significant_change	ENSG00000129351	ILF3	protein_coding	chr19	+	10800523
0.0190822	0.15251	sig_UP_in_Aniso	ENSG00000129351	ILF3	protein_coding	chr19	+	10803074
0.0329333	-0.182236	sig_DOWN_in_Aniso	ENSG00000130066	SAT1	protein_coding	chrX	+	23804035	1.3393	4.54e-21	0.642579	0.0216536
0.100621	-0.201025	no_significant_change	ENSG00000130066	SAT1	protein_coding	chrX	+	23804088
0.873388	0.0268041	no_significant_change	ENSG00000130066	SAT1	protein_coding	chrX	+	23804224
0.137855	0.0764323	no_significant_change	ENSG00000130066	SAT1	protein_coding	chrX	+	23804325
0.995922	0.0943734	no_significant_change	ENSG00000130066	SAT1	protein_coding	chrX	+	23804377
0.0538628	-0.614882	sig_DOWN_in_Aniso	ENSG00000130349	C6orf203	protein_coding	chr6	+	107361556	0.0183031	0.888182	0.197347	0.308071
0.784969	-0.206478	no_significant_change	ENSG00000130349	C6orf203	protein_coding	chr6	+	107363185
0.0123094	0.116249	sig_UP_in_Aniso	ENSG00000130349	C6orf203	protein_coding	chr6	+	107372544
0.00632355	0.385457	sig_UP_in_Aniso	ENSG00000130363	RSPH3	protein_coding	chr6	-	159393902	-0.240391	0.0553822	0.357498	0.106001
0.00632355	-0.395055	sig_DOWN_in_Aniso	ENSG00000130363	RSPH3	protein_coding	chr6	-	159420321
4.77985e-06	-0.189843	sig_DOWN_in_Aniso	ENSG00000130818	ZNF426	protein_coding	chr19	-	9633898	0.407786	3.66e-07	-0.0796464	0.609675
0.000398355	0.82016	sig_UP_in_Aniso	ENSG00000130818	ZNF426	protein_coding	chr19	-	9638415
0.124557	0.552162	no_significant_change	ENSG00000130940	CASZ1	protein_coding	chr1	-	10696666	0.921346	1.77e-08	-0.30787	0.0373648
0.0466483	-0.219323	sig_DOWN_in_Aniso	ENSG00000130940	CASZ1	protein_coding	chr1	-	10707276
0.195915	0.0916364	no_significant_change	ENSG00000131051	RBM39	protein_coding	chr20	-	34291531	0.452103	0.0100878	0.688123	6.01e-09
0.996337	0.0596464	no_significant_change	ENSG00000131051	RBM39	protein_coding	chr20	-	34292248
0.0370908	-0.508593	sig_DOWN_in_Aniso	ENSG00000131051	RBM39	protein_coding	chr20	-	34319284
0.707754	-0.0716457	no_significant_change	ENSG00000131051	RBM39	protein_coding	chr20	-	34320007
0.875116	-0.0508951	no_significant_change	ENSG00000131051	RBM39	protein_coding	chr20	-	34322736
0.947662	-0.103132	no_significant_change	ENSG00000131051	RBM39	protein_coding	chr20	-	34326893
7.2301e-06	1.49304	sig_UP_in_Aniso	ENSG00000131148	EMC8	protein_coding	chr16	-	85804697	-0.19561	0.0068475	-0.180077	0.303693
0.999592	-0.0430589	no_significant_change	ENSG00000131148	EMC8	protein_coding	chr16	-	85812231
0.929706	0.175379	no_significant_change	ENSG00000131148	EMC8	protein_coding	chr16	-	85812920
0.950988	-0.0735685	no_significant_change	ENSG00000131148	EMC8	protein_coding	chr16	-	85813009
0.998699	-0.0430503	no_significant_change	ENSG00000131148	EMC8	protein_coding	chr16	-	85813216
0.99302	0.0511293	no_significant_change	ENSG00000131149	KIAA0182	protein_coding	chr16	+	85706960	0.583669	9.94e-10	0.377921	0.022582
0.0997304	0.244479	sig_UP_in_Aniso	ENSG00000131149	KIAA0182	protein_coding	chr16	+	85707201
0.0842045	-0.160926	sig_DOWN_in_Aniso	ENSG00000131149	KIAA0182	protein_coding	chr16	+	85709805
0.579074	-0.148584	no_significant_change	ENSG00000131263	RLIM	protein_coding	chrX	-	73805069	-0.644458	1.9e-21	0.273506	0.132846
0.818905	-0.143598	no_significant_change	ENSG00000131263	RLIM	protein_coding	chrX	-	73805326
0.000152642	0.53019	sig_UP_in_Aniso	ENSG00000131263	RLIM	protein_coding	chrX	-	73810502
0.283654	0.575238	no_significant_change	ENSG00000131263	RLIM	protein_coding	chrX	-	73810613
0.291926	0.404616	no_significant_change	ENSG00000131368	MRPS25	protein_coding	chr3	-	15083756	-0.368429	0.001045	-0.288922	0.0368203
0.211388	0.580918	no_significant_change	ENSG00000131368	MRPS25	protein_coding	chr3	-	15083924
0.624003	0.157851	no_significant_change	ENSG00000131368	MRPS25	protein_coding	chr3	-	15090043
0.996337	-0.212718	no_significant_change	ENSG00000131368	MRPS25	protein_coding	chr3	-	15091179
0.29247	0.197043	no_significant_change	ENSG00000131368	MRPS25	protein_coding	chr3	-	15092345
0.0848487	-0.106978	sig_DOWN_in_Aniso	ENSG00000131368	MRPS25	protein_coding	chr3	-	15093714
0.649817	-0.0389355	no_significant_change	ENSG00000131507	NDFIP1	protein_coding	chr5	+	141531427	-0.529115	9.86e-12	-0.584831	0.00162218
0.283122	0.0913434	no_significant_change	ENSG00000131507	NDFIP1	protein_coding	chr5	+	141532339
0.0247911	-0.532225	sig_DOWN_in_Aniso	ENSG00000131507	NDFIP1	protein_coding	chr5	+	141532762
0.911014	-0.0215821	no_significant_change	ENSG00000131507	NDFIP1	protein_coding	chr5	+	141533760
0.756299	-0.027019	no_significant_change	ENSG00000131507	NDFIP1	protein_coding	chr5	+	141534004
0.99822	-0.107122	no_significant_change	ENSG00000131724	IL13RA1	protein_coding	chrX	+	117926262	-0.395792	1.18e-06	-0.903582	1.97e-11
0.810857	-0.192383	no_significant_change	ENSG00000131724	IL13RA1	protein_coding	chrX	+	117926324
0.985053	-0.0357941	no_significant_change	ENSG00000131724	IL13RA1	protein_coding	chrX	+	117928495
0.000350933	1.10439	sig_UP_in_Aniso	ENSG00000131724	IL13RA1	protein_coding	chrX	+	117935695
0.816855	-0.330047	no_significant_change	ENSG00000131773	KHDRBS3	protein_coding	chr8	+	136659431	0.866741	4.19e-14	0.577666	0.000732899
0.000429261	-0.290683	sig_DOWN_in_Aniso	ENSG00000131773	KHDRBS3	protein_coding	chr8	+	136659850
4.93037e-06	0.815093	sig_UP_in_Aniso	ENSG00000131773	KHDRBS3	protein_coding	chr8	+	136668756
0.000702647	1.17208	sig_UP_in_Aniso	ENSG00000131773	KHDRBS3	protein_coding	chr8	+	136668927
0.000113817	1.71908	sig_UP_in_Aniso	ENSG00000131773	KHDRBS3	protein_coding	chr8	+	136669067
0.067087	0.0700318	sig_UP_in_Aniso	ENSG00000132002	DNAJB1	protein_coding	chr19	-	14625580	1.68052	3.6e-90	0.67054	0.000254915
0.0890606	-0.131516	sig_DOWN_in_Aniso	ENSG00000132002	DNAJB1	protein_coding	chr19	-	14626589
0.761979	-0.0397908	no_significant_change	ENSG00000132475	H3F3B	protein_coding	chr17	-	73772515	0.874651	1.09e-27	0.660845	0.067797
0.980126	0.134589	no_significant_change	ENSG00000132475	H3F3B	protein_coding	chr17	-	73773389
0.999592	0.0477955	no_significant_change	ENSG00000132475	H3F3B	protein_coding	chr17	-	73773483
0.99501	0.0203132	no_significant_change	ENSG00000132475	H3F3B	protein_coding	chr17	-	73773536
0.705192	0.41588	no_significant_change	ENSG00000132475	H3F3B	protein_coding	chr17	-	73773998
0.998699	0.0766265	no_significant_change	ENSG00000132475	H3F3B	protein_coding	chr17	-	73774096
0.784788	0.0501852	no_significant_change	ENSG00000132475	H3F3B	protein_coding	chr17	-	73774330
0.978144	-0.0867849	no_significant_change	ENSG00000132475	H3F3B	protein_coding	chr17	-	73774577
0.00238627	-0.385026	sig_DOWN_in_Aniso	ENSG00000132475	H3F3B	protein_coding	chr17	-	73774630
0.710127	-0.103381	no_significant_change	ENSG00000132478	UNK	protein_coding	chr17	+	73790156	0.464573	1.3e-17	0.172831	0.192442
0.724603	-0.0813688	no_significant_change	ENSG00000132478	UNK	protein_coding	chr17	+	73790211
0.133927	-0.106023	no_significant_change	ENSG00000132478	UNK	protein_coding	chr17	+	73790269
0.221045	-0.352503	no_significant_change	ENSG00000132478	UNK	protein_coding	chr17	+	73793250
0.00303891	0.207826	sig_UP_in_Aniso	ENSG00000132478	UNK	protein_coding	chr17	+	73821879
0.998637	0.025918	no_significant_change	ENSG00000132670	PTPRA	protein_coding	chr20	+	2847377	0.0289783	0.751782	-0.0997028	0.49524
0.0173903	-1.11979	sig_DOWN_in_Aniso	ENSG00000132670	PTPRA	protein_coding	chr20	+	2964214
0.976591	0.0962091	no_significant_change	ENSG00000132670	PTPRA	protein_coding	chr20	+	3018951
0.987941	0.0491476	no_significant_change	ENSG00000132670	PTPRA	protein_coding	chr20	+	3019004
0.998637	-0.00352206	no_significant_change	ENSG00000132670	PTPRA	protein_coding	chr20	+	3019314
0.00692932	-0.145166	sig_DOWN_in_Aniso	ENSG00000133612	AGAP3	protein_coding	chr7	+	150820725	0.120492	0.450795	-1.48328	1.04e-20
0.00630039	0.132071	sig_UP_in_Aniso	ENSG00000133612	AGAP3	protein_coding	chr7	+	150841521
0.0938682	-0.11174	sig_DOWN_in_Aniso	ENSG00000133703	KRAS	protein_coding	chr12	-	25358180	-0.561688	1.1e-21	-0.378535	0.00138698
0.164993	0.259455	no_significant_change	ENSG00000133703	KRAS	protein_coding	chr12	-	25362772
0.067087	0.0727379	sig_UP_in_Aniso	ENSG00000134294	SLC38A2	protein_coding	chr12	-	46751970	0.069099	0.495224	-0.0747909	0.628376
0.395159	-0.110349	no_significant_change	ENSG00000134294	SLC38A2	protein_coding	chr12	-	46753168
0.121417	-0.291405	no_significant_change	ENSG00000134294	SLC38A2	protein_coding	chr12	-	46766391
0.988178	-0.0694411	no_significant_change	ENSG00000135049	AGTPBP1	protein_coding	chr9	-	88157654	0.304156	0.00115828	0.530678	0.000884126
0.984178	0.0210983	no_significant_change	ENSG00000135049	AGTPBP1	protein_coding	chr9	-	88161453
0.634499	-0.207412	no_significant_change	ENSG00000135049	AGTPBP1	protein_coding	chr9	-	88161856
0.0934944	1.06343	sig_UP_in_Aniso	ENSG00000135049	AGTPBP1	protein_coding	chr9	-	88209126
0.0772745	-0.702293	sig_DOWN_in_Aniso	ENSG00000135108	FBXO21	protein_coding	chr12	-	117579796	0.126429	0.00709381	-0.0517187	0.766429
0.757086	0.166909	no_significant_change	ENSG00000135108	FBXO21	protein_coding	chr12	-	117581152
0.987941	0.00523956	no_significant_change	ENSG00000135108	FBXO21	protein_coding	chr12	-	117581584
0.739319	0.145452	no_significant_change	ENSG00000135108	FBXO21	protein_coding	chr12	-	117581752
0.00012243	-0.521917	sig_DOWN_in_Aniso	ENSG00000135451	TROAP	protein_coding	chr12	+	49718152	1.02322	6.74e-38	-0.605294	0.00772182
2.45082e-06	0.164627	sig_UP_in_Aniso	ENSG00000135451	TROAP	protein_coding	chr12	+	49725513
0.203469	-0.351364	no_significant_change	ENSG00000135452	TSPAN31	protein_coding	chr12	+	58141292	-0.251657	0.000680237	0.191871	0.395972
0.081804	0.103377	sig_UP_in_Aniso	ENSG00000135452	TSPAN31	protein_coding	chr12	+	58142004
0.664795	-0.564063	no_significant_change	ENSG00000135486	HNRNPA1	protein_coding	chr12	+	54678603	not detected		not detected
0.528777	-0.169346	no_significant_change	ENSG00000135486	HNRNPA1	protein_coding	chr12	+	54678663
0.956296	-0.0796816	no_significant_change	ENSG00000135486	HNRNPA1	protein_coding	chr12	+	54679028
0.998637	-0.285379	no_significant_change	ENSG00000135486	HNRNPA1	protein_coding	chr12	+	54679499
8.06167e-27	0.859789	sig_UP_in_Aniso	ENSG00000135486	HNRNPA1	protein_coding	chr12	+	54680870
0.756802	-0.0460441	no_significant_change	ENSG00000135766	EGLN1	protein_coding	chr1	-	231499503	-0.754003	1.77e-37	-0.370653	0.00155536
0.94671	-0.212043	no_significant_change	ENSG00000135766	EGLN1	protein_coding	chr1	-	231501654
0.980126	0.0437938	no_significant_change	ENSG00000135766	EGLN1	protein_coding	chr1	-	231502071
0.00652408	1.11723	sig_UP_in_Aniso	ENSG00000135766	EGLN1	protein_coding	chr1	-	231560095
0.997295	0.0239169	no_significant_change	ENSG00000136152	COG3	protein_coding	chr13	+	46039946	0.932609	7.42e-26	-0.341045	0.00369163
0.174802	-0.293592	no_significant_change	ENSG00000136152	COG3	protein_coding	chr13	+	46040761
0.0797099	0.653334	sig_UP_in_Aniso	ENSG00000136152	COG3	protein_coding	chr13	+	46110759
0.075111	0.770477	sig_UP_in_Aniso	ENSG00000136367	ZFHX2	protein_coding	chr14	-	23990104	not detected		not detected
0.075111	-0.646179	sig_DOWN_in_Aniso	ENSG00000136367	ZFHX2	protein_coding	chr14	-	24020760
1.41174e-07	-0.262626	sig_DOWN_in_Aniso	ENSG00000136856	SLC2A8	protein_coding	chr9	+	130169946	0.840964	1.33e-10	0.400682	0.0107595
3.7516e-06	0.642276	sig_UP_in_Aniso	ENSG00000136856	SLC2A8	protein_coding	chr9	+	130170696
6.41014e-06	1.34512	sig_UP_in_Aniso	ENSG00000136942	RPL35	protein_coding	chr9	-	127599878	-0.546092	1.22e-09	0.0654018	0.768481
0.956296	-0.0327955	no_significant_change	ENSG00000136942	RPL35	protein_coding	chr9	-	127620107
0.533569	-0.0461409	no_significant_change	ENSG00000136942	RPL35	protein_coding	chr9	-	127620163
0.00209578	0.793322	sig_UP_in_Aniso	ENSG00000137504	CREBZF	protein_coding	chr11	-	85369848	-0.241962	0.0431452	0.577719	0.000313166
0.0206215	0.534959	sig_UP_in_Aniso	ENSG00000137504	CREBZF	protein_coding	chr11	-	85370576
0.000844234	0.960276	sig_UP_in_Aniso	ENSG00000137504	CREBZF	protein_coding	chr11	-	85370758
0.444499	-0.755757	no_significant_change	ENSG00000137504	CREBZF	protein_coding	chr11	-	85372018
2.7476e-06	-0.473808	sig_DOWN_in_Aniso	ENSG00000137504	CREBZF	protein_coding	chr11	-	85372111
0.0685272	-0.416326	sig_DOWN_in_Aniso	ENSG00000137522	RNF121	protein_coding	chr11	+	71707580	0.0614153	0.325969	-0.127193	0.442586
0.0133716	0.101693	sig_UP_in_Aniso	ENSG00000137522	RNF121	protein_coding	chr11	+	71708641
0.36436	-0.214659	no_significant_change	ENSG00000137814	HAUS2	protein_coding	chr15	+	42853885	0.233673	0.0121796	-0.0105769	0.951039
0.982718	0.113635	no_significant_change	ENSG00000137814	HAUS2	protein_coding	chr15	+	42858962
0.695656	-0.308288	no_significant_change	ENSG00000137814	HAUS2	protein_coding	chr15	+	42859228
0.0464616	0.394924	sig_UP_in_Aniso	ENSG00000137814	HAUS2	protein_coding	chr15	+	42861126
0.0232914	0.777709	sig_UP_in_Aniso	ENSG00000137944	CCBL2	protein_coding	chr1	-	89386727	0.0509565	0.662434	0.186875	0.208698
0.549863	-0.111849	no_significant_change	ENSG00000137944	CCBL2	protein_coding	chr1	-	89401461
0.993928	-0.111104	no_significant_change	ENSG00000137944	CCBL2	protein_coding	chr1	-	89401535
0.997295	-0.0151533	no_significant_change	ENSG00000138326	RPS24	protein_coding	chr10	+	79800454	-0.650835	2.09e-26	0.0713137	0.667743
0.998474	-0.00973158	no_significant_change	ENSG00000138326	RPS24	protein_coding	chr10	+	79800508
0.0423321	0.975387	sig_UP_in_Aniso	ENSG00000138326	RPS24	protein_coding	chr10	+	79815234
0.0178081	0.832197	sig_UP_in_Aniso	ENSG00000138495	COX17	protein_coding	chr3	-	119382843	-0.431176	8.7e-06	0.404911	0.00496386
0.000265779	-0.100441	sig_DOWN_in_Aniso	ENSG00000138495	COX17	protein_coding	chr3	-	119388373
0.00818177	-0.063831	sig_DOWN_in_Aniso	ENSG00000138674	SEC31A	protein_coding	chr4	-	83739813	-0.102603	0.0526035	-0.0543446	0.703724
0.0971486	0.757105	sig_UP_in_Aniso	ENSG00000138674	SEC31A	protein_coding	chr4	-	83814607
0.824875	-0.291049	no_significant_change	ENSG00000139641	ESYT1	protein_coding	chr12	+	56516278	-0.0521213	0.504575	0.563361	0.000549228
0.947662	0.112531	no_significant_change	ENSG00000139641	ESYT1	protein_coding	chr12	+	56518041
0.733723	-0.0240511	no_significant_change	ENSG00000139641	ESYT1	protein_coding	chr12	+	56538452
0.00663143	2.01998	sig_UP_in_Aniso	ENSG00000139641	ESYT1	protein_coding	chr12	+	56543893
0.000258128	0.0743716	sig_UP_in_Aniso	ENSG00000140395	WDR61	protein_coding	chr15	-	78575578
0.00971442	-0.548808	sig_DOWN_in_Aniso	ENSG00000140395	WDR61	protein_coding	chr15	-	78587759	-0.309621	0.000379586	-0.401262	0.00161392
3.78461e-05	-0.570999	sig_DOWN_in_Aniso	ENSG00000140575	IQGAP1	protein_coding	chr15	+	90934188	1.43633	7.17e-16	0.355088	0.00423101
0.863088	0.374796	no_significant_change	ENSG00000140575	IQGAP1	protein_coding	chr15	+	91044784
0.000283944	0.194587	sig_UP_in_Aniso	ENSG00000140575	IQGAP1	protein_coding	chr15	+	91045470
0.306078	0.326694	no_significant_change	ENSG00000140988	RPS2	protein_coding	chr16	-	2011996	-0.459476	0.000489233	0.0737608	0.79114
0.077569	-0.0304197	sig_DOWN_in_Aniso	ENSG00000140988	RPS2	protein_coding	chr16	-	2012058
0.0253747	-0.106345	sig_DOWN_in_Aniso	ENSG00000140995	DEF8	protein_coding	chr16	+	90025773	-0.057626	0.636546	0.268969	0.0575445
0.0500583	0.208503	sig_UP_in_Aniso	ENSG00000140995	DEF8	protein_coding	chr16	+	90034467
0.0730106	0.433057	sig_UP_in_Aniso	ENSG00000141030	COPS3	protein_coding	chr17	-	17147998	-0.248582	1.78e-05	0.533675	6.94e-05
0.957348	-0.0360195	no_significant_change	ENSG00000141030	COPS3	protein_coding	chr17	-	17150149
0.998637	-0.063797	no_significant_change	ENSG00000141030	COPS3	protein_coding	chr17	-	17150215
0.994396	-0.0284251	no_significant_change	ENSG00000141279	NPEPPS	protein_coding	chr17	+	45699548	-0.018727	0.829533	-0.805918	6.09e-07
0.0260606	-0.167316	sig_DOWN_in_Aniso	ENSG00000141279	NPEPPS	protein_coding	chr17	+	45700641
0.0122449	0.366343	sig_UP_in_Aniso	ENSG00000141279	NPEPPS	protein_coding	chr17	+	45702191
0.911014	0.211341	no_significant_change	ENSG00000141279	NPEPPS	protein_coding	chr17	+	45702257
0.00959946	0.186056	sig_UP_in_Aniso	ENSG00000141298	SSH2	protein_coding	chr17	-	27952957	0.159391	0.153766	0.554435	0.00446702
0.0114503	-0.290502	sig_DOWN_in_Aniso	ENSG00000141298	SSH2	protein_coding	chr17	-	28252241
3.09603e-05	-0.367248	sig_DOWN_in_Aniso	ENSG00000141664	ZCCHC2	protein_coding	chr18	+	60245816	0.804203	3.74e-18	0.554896	0.00239674
4.31584e-05	1.36373	sig_UP_in_Aniso	ENSG00000141664	ZCCHC2	protein_coding	chr18	+	60254939
0.986166	0.0636625	no_significant_change	ENSG00000142396	ERVK3-1	ncRNA	chr19	+	58826509	0.338008	0.00141099	not detected
0.027588	-0.155313	sig_DOWN_in_Aniso	ENSG00000142396	ERVK3-1	ncRNA	chr19	+	58826569
0.998699	-0.014245	no_significant_change	ENSG00000142396	ERVK3-1	ncRNA	chr19	+	58826813
0.0272107	0.181729	sig_UP_in_Aniso	ENSG00000142396	ERVK3-1	ncRNA	chr19	+	58827018
0.06786	0.244771	sig_UP_in_Aniso	ENSG00000143190	POU2F1	protein_coding	chr1	+	167395665	0.00102931	0.990658	0.0398174	0.795468
0.06786	-0.206979	sig_DOWN_in_Aniso	ENSG00000143190	POU2F1	protein_coding	chr1	+	167396573
0.0791024	-0.384057	sig_DOWN_in_Aniso	ENSG00000143303	RRNAD1	protein_coding	chr1	+	156699483	0.436552	4.15e-08	0.299357	0.0206392
0.538512	-0.154728	no_significant_change	ENSG00000143303	RRNAD1	protein_coding	chr1	+	156699659
0.00699142	0.245265	sig_UP_in_Aniso	ENSG00000143303	RRNAD1	protein_coding	chr1	+	156706741
0.00238627	-0.104456	sig_DOWN_in_Aniso	ENSG00000143384	MCL1	protein_coding	chr1	-	150547035	2.61659	0	1.32932	0.00187933
0.00110441	0.127787	sig_UP_in_Aniso	ENSG00000143384	MCL1	protein_coding	chr1	-	150548437
0.971533	-0.0372544	no_significant_change	ENSG00000143384	MCL1	protein_coding	chr1	-	150548542
0.650583	0.217734	no_significant_change	ENSG00000143384	MCL1	protein_coding	chr1	-	150549663
0.0175272	-0.681751	sig_DOWN_in_Aniso	ENSG00000143398	PIP5K1A	protein_coding	chr1	+	151216655	0.0563486	0.231253	-0.0921292	0.619977
0.0175272	0.433701	sig_UP_in_Aniso	ENSG00000143398	PIP5K1A	protein_coding	chr1	+	151222013
0.0056893	0.164551	sig_UP_in_Aniso	ENSG00000143578	CREB3L4	protein_coding	chr1	+	153946832	0.225241	0.00639554	-0.230678	0.278753
0.0386609	-0.503831	sig_DOWN_in_Aniso	ENSG00000143578	CREB3L4	protein_coding	chr1	+	153951381
0.998699	-0.0306837	no_significant_change	ENSG00000143761	ARF1	protein_coding	chr1	+	228286764	-0.341964	0.00171153	0.268819	0.320642
0.998637	-0.0228056	no_significant_change	ENSG00000143761	ARF1	protein_coding	chr1	+	228286824
0.998699	-0.0123973	no_significant_change	ENSG00000143761	ARF1	protein_coding	chr1	+	228286910
0.998696	-0.0899363	no_significant_change	ENSG00000143761	ARF1	protein_coding	chr1	+	228292415
0.067019	0.786334	sig_UP_in_Aniso	ENSG00000143761	ARF1	protein_coding	chr1	+	228299217
0.0130413	-0.673748	sig_DOWN_in_Aniso	ENSG00000143786	CNIH3	protein_coding	chr1	+	224708923	0.351706	0.000104283	-0.0266003	0.854644
0.00054784	0.151425	sig_UP_in_Aniso	ENSG00000143786	CNIH3	protein_coding	chr1	+	224928255
0.00473943	-0.769982	sig_DOWN_in_Aniso	ENSG00000144840	RABL3	protein_coding	chr3	-	120406073	-0.421556	1.95e-09	-0.125009	0.337752
0.00175621	0.386121	sig_UP_in_Aniso	ENSG00000144840	RABL3	protein_coding	chr3	-	120408378
0.986054	-0.100008	no_significant_change	ENSG00000145147	SLIT2	protein_coding	chr4	+	20263034	0.817745	7.34e-12	0.795676	0.0599488
0.0735394	0.598051	sig_UP_in_Aniso	ENSG00000145147	SLIT2	protein_coding	chr4	+	20279980
0.297484	0.747653	no_significant_change	ENSG00000145147	SLIT2	protein_coding	chr4	+	20280032
1.96663e-06	0.446959	sig_UP_in_Aniso	ENSG00000145147	SLIT2	protein_coding	chr4	+	20284331
0.0471339	0.990539	sig_UP_in_Aniso	ENSG00000145147	SLIT2	protein_coding	chr4	+	20301141
0.00557553	-1.27624	sig_DOWN_in_Aniso	ENSG00000145147	SLIT2	protein_coding	chr4	+	20340713
0.638083	-0.181404	no_significant_change	ENSG00000145147	SLIT2	protein_coding	chr4	+	20620789
0.610406	-0.191959	no_significant_change	ENSG00000145147	SLIT2	protein_coding	chr4	+	20621932
0.836187	-0.297583	no_significant_change	ENSG00000145147	SLIT2	protein_coding	chr4	+	20622044
0.614704	-0.101612	no_significant_change	ENSG00000145147	SLIT2	protein_coding	chr4	+	20622179
0.948055	-0.220763	no_significant_change	ENSG00000145147	SLIT2	protein_coding	chr4	+	20622857
0.572063	-0.27471	no_significant_change	ENSG00000145191	EIF2B5	protein_coding	chr3	+	183854760	0.204223	0.000232043	0.226158	0.0662371
0.143712	0.10782	no_significant_change	ENSG00000145191	EIF2B5	protein_coding	chr3	+	183863098
0.998699	-0.035283	no_significant_change	ENSG00000145191	EIF2B5	protein_coding	chr3	+	183891398
0.376402	-0.0486732	no_significant_change	ENSG00000145191	EIF2B5	protein_coding	chr3	+	183901878
0.929706	0.155063	no_significant_change	ENSG00000145191	EIF2B5	protein_coding	chr3	+	183917190
0.0498067	0.702931	sig_UP_in_Aniso	ENSG00000145191	EIF2B5	protein_coding	chr3	+	183960116
0.000597775	0.339025	sig_UP_in_Aniso	ENSG00000145390	USP53	protein_coding	chr4	+	120135275	1.04076	4.18e-11	1.08441	3.28e-07
0.0114584	-0.32285	sig_DOWN_in_Aniso	ENSG00000145390	USP53	protein_coding	chr4	+	120215783
0.904925	-0.287585	no_significant_change	ENSG00000145390	USP53	protein_coding	chr4	+	120215900
0.00373735	0.176849	sig_UP_in_Aniso	ENSG00000145592	RPL37	protein_coding	chr5	-	40825365	-0.509755	9.57e-14	-0.166656	0.267947
0.280364	0.254956	no_significant_change	ENSG00000145592	RPL37	protein_coding	chr5	-	40826244
0.00391832	0.167517	sig_UP_in_Aniso	ENSG00000145592	RPL37	protein_coding	chr5	-	40826433
0.995257	-0.118336	no_significant_change	ENSG00000145592	RPL37	protein_coding	chr5	-	40827698
0.929706	-0.360347	no_significant_change	ENSG00000145592	RPL37	protein_coding	chr5	-	40831427
0.998699	-0.249205	no_significant_change	ENSG00000145592	RPL37	protein_coding	chr5	-	40831929
0.00649038	-0.0739508	sig_DOWN_in_Aniso	ENSG00000145592	RPL37	protein_coding	chr5	-	40832557
0.25042	-0.478005	no_significant_change	ENSG00000146267	FAXC	protein_coding	chr6	-	99720796	-0.350386	3.6e-06	-1.31667	2.25e-22
0.04989	0.0790833	sig_UP_in_Aniso	ENSG00000146267	FAXC	protein_coding	chr6	-	99728536
0.0066472	0.159965	sig_UP_in_Aniso	ENSG00000146592	CREB5	protein_coding	chr7	+	28450376	1.92975	1.14e-107	1.29784	2.11e-07
0.933272	0.24533	no_significant_change	ENSG00000146592	CREB5	protein_coding	chr7	+	28451325
0.998699	0.0599065	no_significant_change	ENSG00000146592	CREB5	protein_coding	chr7	+	28453742
0.947662	-0.140107	no_significant_change	ENSG00000146592	CREB5	protein_coding	chr7	+	28859176
2.57559e-08	-0.551989	sig_DOWN_in_Aniso	ENSG00000146592	CREB5	protein_coding	chr7	+	28865505
0.251078	-0.143928	no_significant_change	ENSG00000146833	TRIM4	protein_coding	chr7	-	99488522	0.219945	1.24e-06	-0.159339	0.373157
0.987941	-0.146079	no_significant_change	ENSG00000146833	TRIM4	protein_coding	chr7	-	99488574
0.000242427	1.15904	sig_UP_in_Aniso	ENSG00000146833	TRIM4	protein_coding	chr7	-	99498142
0.790784	0.333844	no_significant_change	ENSG00000147274	RBMX	protein_coding	chrX	-	135929968	0.0049332	0.956556	0.45218	0.000580076
0.226654	0.0766565	no_significant_change	ENSG00000147274	RBMX	protein_coding	chrX	-	135951350
0.650583	-0.062333	no_significant_change	ENSG00000147274	RBMX	protein_coding	chrX	-	135955613
0.283654	-0.116117	no_significant_change	ENSG00000147274	RBMX	protein_coding	chrX	-	135956018
0.0702829	-0.509833	sig_DOWN_in_Aniso	ENSG00000147274	RBMX	protein_coding	chrX	-	135956070
0.998637	-0.0292186	no_significant_change	ENSG00000147454	SLC25A37	protein_coding	chr8	+	23389437	-0.355799	5.72e-06	-1.06389	4.33e-16
0.00196733	-0.770187	sig_DOWN_in_Aniso	ENSG00000147454	SLC25A37	protein_coding	chr8	+	23425094
0.153868	0.208414	no_significant_change	ENSG00000147454	SLC25A37	protein_coding	chr8	+	23429716
0.781924	-0.0833754	no_significant_change	ENSG00000147454	SLC25A37	protein_coding	chr8	+	23430061
0.999592	0.0360419	no_significant_change	ENSG00000147454	SLC25A37	protein_coding	chr8	+	23432974
0.071803	-0.250388	sig_DOWN_in_Aniso	ENSG00000148335	NTMT1	protein_coding	chr9	+	132397877	0.143688	0.218587	0.333885	0.0758275
0.071803	0.615746	sig_UP_in_Aniso	ENSG00000148335	NTMT1	protein_coding	chr9	+	132399022
0.000100686	-0.220759	sig_DOWN_in_Aniso	ENSG00000148411	NACC2	protein_coding	chr9	-	138898383	-1.16051	1.82e-38	-0.912103	7.35e-07
0.000729108	0.427787	sig_UP_in_Aniso	ENSG00000148411	NACC2	protein_coding	chr9	-	138903203
0.250178	-0.109382	no_significant_change	ENSG00000148688	RPP30	protein_coding	chr10	+	92660531	-0.42284	1.93e-12	-0.300105	0.0123139
0.995042	0.026019	no_significant_change	ENSG00000148688	RPP30	protein_coding	chr10	+	92660597
0.81133	-0.228097	no_significant_change	ENSG00000148688	RPP30	protein_coding	chr10	+	92660733
0.984263	-0.117551	no_significant_change	ENSG00000148688	RPP30	protein_coding	chr10	+	92662520
0.998699	-0.0510369	no_significant_change	ENSG00000148688	RPP30	protein_coding	chr10	+	92665410
0.0217892	0.246147	sig_UP_in_Aniso	ENSG00000148688	RPP30	protein_coding	chr10	+	92665821
0.0837807	0.117256	sig_UP_in_Aniso	ENSG00000149798	CDC42EP2	protein_coding	chr11	+	65089563	0.983298	3.06e-13	0.191589	0.355652
0.193183	-0.343961	no_significant_change	ENSG00000149798	CDC42EP2	protein_coding	chr11	+	65089899
0.0380621	-0.557043	sig_DOWN_in_Aniso	ENSG00000151148	UBE3B	protein_coding	chr12	+	109928442	-0.123616	0.120191	0.131495	0.376494
0.00335703	0.137755	sig_UP_in_Aniso	ENSG00000151148	UBE3B	protein_coding	chr12	+	109974504
9.68893e-05	0.903439	sig_UP_in_Aniso	ENSG00000151353	TMEM18	protein_coding	chr2	-	663878	0.487628	1.04e-13	0.365243	0.0583769
0.976007	-0.012525	no_significant_change	ENSG00000151353	TMEM18	protein_coding	chr2	-	667973
0.0839453	-0.237763	sig_DOWN_in_Aniso	ENSG00000151353	TMEM18	protein_coding	chr2	-	669209
0.988244	-0.00157327	no_significant_change	ENSG00000151353	TMEM18	protein_coding	chr2	-	669607
0.0511163	-0.390622	sig_DOWN_in_Aniso	ENSG00000151458	ANKRD50	protein_coding	chr4	-	125585204	0.29895	0.00582567	0.921229	7.53e-06
0.0467947	0.371469	sig_UP_in_Aniso	ENSG00000151458	ANKRD50	protein_coding	chr4	-	125588172
0.148998	-0.27403	no_significant_change	ENSG00000151503	NCAPD3	protein_coding	chr11	-	134020546	0.0431762	0.650955	-0.435425	0.00102782
0.0735223	0.198471	sig_UP_in_Aniso	ENSG00000151503	NCAPD3	protein_coding	chr11	-	134022339
0.96469	-0.1034	no_significant_change	ENSG00000151503	NCAPD3	protein_coding	chr11	-	134092970
0.000178007	1.12138	sig_UP_in_Aniso	ENSG00000152061	RABGAP1L	protein_coding	chr1	+	174215477	0.710182	6.86e-12	0.371225	0.0224976
0.9681	-0.188187	no_significant_change	ENSG00000152061	RABGAP1L	protein_coding	chr1	+	174927312
0.968483	-0.208336	no_significant_change	ENSG00000152061	RABGAP1L	protein_coding	chr1	+	174961093
0.998699	-0.0327379	no_significant_change	ENSG00000152061	RABGAP1L	protein_coding	chr1	+	174964347
0.216945	-0.154897	no_significant_change	ENSG00000152061	RABGAP1L	protein_coding	chr1	+	174964438
0.0924288	-0.2412	sig_DOWN_in_Aniso	ENSG00000152256	PDK1	protein_coding	chr2	+	173463512	0.321738	1.67e-05	-0.0784913	0.562994
0.302385	0.390625	no_significant_change	ENSG00000152256	PDK1	protein_coding	chr2	+	173479453
0.335748	0.292297	no_significant_change	ENSG00000152256	PDK1	protein_coding	chr2	+	173492760
0.402715	-0.825277	no_significant_change	ENSG00000152413	HOMER1	protein_coding	chr5	-	78668614	2.1391	6.49e-91	1.1259	0.0182915
5.83014e-08	-0.649109	sig_DOWN_in_Aniso	ENSG00000152413	HOMER1	protein_coding	chr5	-	78668920
0.0341592	-1.15283	sig_DOWN_in_Aniso	ENSG00000152413	HOMER1	protein_coding	chr5	-	78669077
0.000125819	-0.807709	sig_DOWN_in_Aniso	ENSG00000152413	HOMER1	protein_coding	chr5	-	78670191
0.285721	0.465886	no_significant_change	ENSG00000152413	HOMER1	protein_coding	chr5	-	78720165
0.00284211	0.957421	sig_UP_in_Aniso	ENSG00000152413	HOMER1	protein_coding	chr5	-	78723577
0.0399864	1.11454	sig_UP_in_Aniso	ENSG00000152413	HOMER1	protein_coding	chr5	-	78723642
1.60871e-13	0.938957	sig_UP_in_Aniso	ENSG00000152413	HOMER1	protein_coding	chr5	-	78729699
0.447155	0.638418	no_significant_change	ENSG00000152413	HOMER1	protein_coding	chr5	-	78734532
0.12926	1.18385	no_significant_change	ENSG00000152413	HOMER1	protein_coding	chr5	-	78808126
0.0735223	1.05385	sig_UP_in_Aniso	ENSG00000152413	HOMER1	protein_coding	chr5	-	78808369
0.00219933	-0.262861	sig_DOWN_in_Aniso	ENSG00000152433	ZNF547	protein_coding	chr19	+	57876726	0.935376	4.6e-26	1.18108	4.58e-10
0.648065	0.361281	no_significant_change	ENSG00000152433	ZNF547	protein_coding	chr19	+	57878638
0.0421505	0.487174	sig_UP_in_Aniso	ENSG00000152433	ZNF547	protein_coding	chr19	+	57889832
0.0889585	-0.258259	sig_DOWN_in_Aniso	ENSG00000152454	ZNF256	protein_coding	chr19	-	58447338	0.650983	2.99e-20	0.379252	0.00594683
0.0717356	0.218243	sig_UP_in_Aniso	ENSG00000152454	ZNF256	protein_coding	chr19	-	58452201
0.00397396	1.01811	sig_UP_in_Aniso	ENSG00000152601	MBNL1	protein_coding	chr3	+	152020588	-0.354405	0.000498331	0.150572	0.31618
2.70204e-05	-0.084725	sig_DOWN_in_Aniso	ENSG00000152601	MBNL1	protein_coding	chr3	+	152183568
0.00971442	-0.179713	sig_DOWN_in_Aniso	ENSG00000153707	PTPRD	protein_coding	chr9	-	8314245	0.0260109	0.849511	-0.472358	0.00319662
0.0696176	0.664894	sig_UP_in_Aniso	ENSG00000153707	PTPRD	protein_coding	chr9	-	8316229
0.976591	0.552639	no_significant_change	ENSG00000154734	ADAMTS1	protein_coding	chr21	-	28208188	1.74599	3.73e-47	1.26314	1.27e-06
3.52436e-12	0.30862	sig_UP_in_Aniso	ENSG00000154734	ADAMTS1	protein_coding	chr21	-	28208606
1.53697e-05	-0.420601	sig_DOWN_in_Aniso	ENSG00000154734	ADAMTS1	protein_coding	chr21	-	28208731
0.000152642	-0.269009	sig_DOWN_in_Aniso	ENSG00000154734	ADAMTS1	protein_coding	chr21	-	28209188
8.64076e-08	-0.415205	sig_DOWN_in_Aniso	ENSG00000154734	ADAMTS1	protein_coding	chr21	-	28209329
0.998699	0.282473	no_significant_change	ENSG00000154734	ADAMTS1	protein_coding	chr21	-	28209867
0.495829	0.221167	no_significant_change	ENSG00000155189	AGPAT5	protein_coding	chr8	+	6568088	-1.2737	5.6e-95	-0.51096	9.52e-05
0.0036438	0.353755	sig_UP_in_Aniso	ENSG00000155189	AGPAT5	protein_coding	chr8	+	6615026
0.828937	0.184532	no_significant_change	ENSG00000155189	AGPAT5	protein_coding	chr8	+	6616523
0.0388566	-0.163773	sig_DOWN_in_Aniso	ENSG00000155189	AGPAT5	protein_coding	chr8	+	6617184
0.599695	-0.298786	no_significant_change	ENSG00000155189	AGPAT5	protein_coding	chr8	+	6619019
0.00238627	-0.698599	sig_DOWN_in_Aniso	ENSG00000155275	TRMT44	protein_coding	chr4	+	8458268	1.39797	1.56e-72	-0.434768	0.000228865
0.70072	0.522443	no_significant_change	ENSG00000155275	TRMT44	protein_coding	chr4	+	8470041
0.0492505	0.272176	sig_UP_in_Aniso	ENSG00000155275	TRMT44	protein_coding	chr4	+	8478281
0.998581	0.0520677	no_significant_change	ENSG00000155816	FMN2	protein_coding	chr1	+	240257418	1.30543	9.74e-79	0.393293	0.00604614
0.103751	-0.32328	no_significant_change	ENSG00000155816	FMN2	protein_coding	chr1	+	240258402
0.0773159	0.974012	sig_UP_in_Aniso	ENSG00000155816	FMN2	protein_coding	chr1	+	240403131
0.0288254	0.989242	sig_UP_in_Aniso	ENSG00000156110	ADK	protein_coding	chr10	+	76004896	-0.238604	0.0123041	0.820579	3.65e-06
0.971117	0.019567	no_significant_change	ENSG00000156110	ADK	protein_coding	chr10	+	76468296
0.998637	-0.0209263	no_significant_change	ENSG00000156110	ADK	protein_coding	chr10	+	76468457
0.942569	-0.157069	no_significant_change	ENSG00000156110	ADK	protein_coding	chr10	+	76468781
0.811014	-0.11561	no_significant_change	ENSG00000156110	ADK	protein_coding	chr10	+	76469047
0.998699	0.031884	no_significant_change	ENSG00000156110	ADK	protein_coding	chr10	+	76469923
0.998699	0.0409021	no_significant_change	ENSG00000156110	ADK	protein_coding	chr10	+	76473628
0.996687	0.0512807	no_significant_change	ENSG00000156239	N6AMT1	protein_coding	chr21	-	30243544	-0.398768	1.76e-07	-0.0126225	0.942553
0.0175272	0.249655	sig_UP_in_Aniso	ENSG00000156239	N6AMT1	protein_coding	chr21	-	30244511
0.0730106	-0.322314	sig_DOWN_in_Aniso	ENSG00000156239	N6AMT1	protein_coding	chr21	-	30246961
0.874362	-0.226113	no_significant_change	ENSG00000156239	N6AMT1	protein_coding	chr21	-	30248442
0.95369	-0.0609308	no_significant_change	ENSG00000156304	SCAF4	protein_coding	chr21	-	33039042	0.575825	9.66e-14	0.0701045	0.666085
0.26108	0.196788	no_significant_change	ENSG00000156304	SCAF4	protein_coding	chr21	-	33043347
0.994396	0.122347	no_significant_change	ENSG00000156304	SCAF4	protein_coding	chr21	-	33043455
0.0513293	-0.327873	sig_DOWN_in_Aniso	ENSG00000156304	SCAF4	protein_coding	chr21	-	33073069
7.23157e-12	-0.346184	sig_DOWN_in_Aniso	ENSG00000156675	RAB11FIP1	protein_coding	chr8	-	37716468	0.329993	1.06e-06	0.89817	5.47e-06
0.0341592	1.05044	sig_UP_in_Aniso	ENSG00000156675	RAB11FIP1	protein_coding	chr8	-	37717793
3.65678e-08	0.610651	sig_UP_in_Aniso	ENSG00000156675	RAB11FIP1	protein_coding	chr8	-	37718185
0.99707	0.103962	no_significant_change	ENSG00000156804	FBXO32	protein_coding	chr8	-	124510128	1.43191	2.17e-156	0.738038	0.00129781
0.0363214	0.170786	sig_UP_in_Aniso	ENSG00000156804	FBXO32	protein_coding	chr8	-	124515365
0.0102362	-0.45793	sig_DOWN_in_Aniso	ENSG00000156804	FBXO32	protein_coding	chr8	-	124539238
2.13256e-05	-0.933217	sig_DOWN_in_Aniso	ENSG00000156976	EIF4A2	protein_coding	chr3	+	186506215	2.41955	1.35e-67	0.709627	0.0231932
0.998699	0.146846	no_significant_change	ENSG00000156976	EIF4A2	protein_coding	chr3	+	186507497
0.486703	-0.0456599	no_significant_change	ENSG00000156976	EIF4A2	protein_coding	chr3	+	186507554
0.0363214	0.109472	sig_UP_in_Aniso	ENSG00000156976	EIF4A2	protein_coding	chr3	+	186507683
0.00273719	0.21131	sig_UP_in_Aniso	ENSG00000157637	SLC38A10	protein_coding	chr17	-	79218803	0.107542	0.559842	-0.410753	0.00440518
0.889382	0.286856	no_significant_change	ENSG00000157637	SLC38A10	protein_coding	chr17	-	79219187
0.000690234	-0.287304	sig_DOWN_in_Aniso	ENSG00000157637	SLC38A10	protein_coding	chr17	-	79224671
0.168453	0.132282	no_significant_change	ENSG00000157800	SLC37A3	protein_coding	chr7	-	140033552	-0.169906	0.0658732	-0.915623	1.81e-09
0.00836583	-1.06415	sig_DOWN_in_Aniso	ENSG00000157800	SLC37A3	protein_coding	chr7	-	140048277
0.624984	-0.0854078	no_significant_change	ENSG00000157800	SLC37A3	protein_coding	chr7	-	140075335
6.41014e-06	-1.16636	sig_DOWN_in_Aniso	ENSG00000158373	HIST1H2BD	protein_coding	chr6	+	26158811	3.81821	5.66e-176	1.15726	0.014899
5.17128e-05	-0.867338	sig_DOWN_in_Aniso	ENSG00000158373	HIST1H2BD	protein_coding	chr6	+	26158865
0.998699	-0.00213968	no_significant_change	ENSG00000158373	HIST1H2BD	protein_coding	chr6	+	26171574
1.19146e-05	0.736435	sig_UP_in_Aniso	ENSG00000158373	HIST1H2BD	protein_coding	chr6	+	26173885
0.274765	0.684798	no_significant_change	ENSG00000158373	HIST1H2BD	protein_coding	chr6	+	26175612
0.797997	0.494895	no_significant_change	ENSG00000158373	HIST1H2BD	protein_coding	chr6	+	26178486
0.193129	0.428526	no_significant_change	ENSG00000158467	AHCYL2	protein_coding	chr7	+	129067053	0.322426	0.000187061	0.465447	0.0122017
0.0538628	-0.112171	sig_DOWN_in_Aniso	ENSG00000158467	AHCYL2	protein_coding	chr7	+	129070051
0.0806811	0.850893	sig_UP_in_Aniso	ENSG00000158545	ZC3H18	protein_coding	chr16	+	88656363	0.331707	0.000122836	0.209055	0.14877
0.994732	0.000712336	no_significant_change	ENSG00000158545	ZC3H18	protein_coding	chr16	+	88694191
0.0705568	-0.0659506	sig_DOWN_in_Aniso	ENSG00000158545	ZC3H18	protein_coding	chr16	+	88698371
0.000705637	-0.263862	sig_DOWN_in_Aniso	ENSG00000158553	POM121L2	protein_coding	chr6	-	27198190	0.229705	0.465891	0.597307	0.204484
0.00852104	0.818349	sig_UP_in_Aniso	ENSG00000158553	POM121L2	protein_coding	chr6	-	27271995
0.379565	0.495203	no_significant_change	ENSG00000158615	PPP1R15B	protein_coding	chr1	-	204364956	not detected		not detected
0.00283283	0.849132	sig_UP_in_Aniso	ENSG00000158615	PPP1R15B	protein_coding	chr1	-	204365088
2.04413e-07	-0.385882	sig_DOWN_in_Aniso	ENSG00000158615	PPP1R15B	protein_coding	chr1	-	204374136
0.143458	0.512721	no_significant_change	ENSG00000159086	GCFC1	protein_coding	chr21	-	34106560	0.90708	2.22e-08	0.0365077	0.830558
0.0782455	-0.214992	sig_DOWN_in_Aniso	ENSG00000159086	GCFC1	protein_coding	chr21	-	34113650
0.000515142	0.624143	sig_UP_in_Aniso	ENSG00000160216	AGPAT3	protein_coding	chr21	+	45309670	-0.426358	0.000756468	-1.69299	3.41e-24
0.625551	-0.422749	no_significant_change	ENSG00000160216	AGPAT3	protein_coding	chr21	+	45393533
0.680378	0.279877	no_significant_change	ENSG00000160216	AGPAT3	protein_coding	chr21	+	45403015
0.969907	-0.0693457	no_significant_change	ENSG00000160216	AGPAT3	protein_coding	chr21	+	45404552
0.996337	-0.108959	no_significant_change	ENSG00000160216	AGPAT3	protein_coding	chr21	+	45404663
0.973741	-0.066104	no_significant_change	ENSG00000160216	AGPAT3	protein_coding	chr21	+	45406415
0.969249	0.0186596	no_significant_change	ENSG00000160216	AGPAT3	protein_coding	chr21	+	45407020
3.02996e-05	0.643909	sig_UP_in_Aniso	ENSG00000160298	C21orf58	protein_coding	chr21	-	47720425	0.309302	0.000327633	-0.160486	0.270573
4.79704e-05	-0.639739	sig_DOWN_in_Aniso	ENSG00000160298	C21orf58	protein_coding	chr21	-	47741342
0.485883	-0.154215	no_significant_change	ENSG00000160305	DIP2A	protein_coding	chr21	+	47966217	0.77417	7.25e-58	-0.923468	1.98e-10
0.999592	-0.0277674	no_significant_change	ENSG00000160305	DIP2A	protein_coding	chr21	+	47967115
0.0979439	0.728101	sig_UP_in_Aniso	ENSG00000160305	DIP2A	protein_coding	chr21	+	47989392
8.29305e-08	-0.380833	sig_DOWN_in_Aniso	ENSG00000160688	FLAD1	protein_coding	chr1	+	154961487	-0.0581989	0.476322	-0.378412	0.0685936
7.40507e-09	0.18264	sig_UP_in_Aniso	ENSG00000160688	FLAD1	protein_coding	chr1	+	154965587
2.79471e-08	0.527363	sig_UP_in_Aniso	ENSG00000160716	CHRNB2	protein_coding	chr1	+	154652310	-0.121097	0.760413	0.185787	0.526018
3.7949e-07	-0.700498	sig_DOWN_in_Aniso	ENSG00000160716	CHRNB2	protein_coding	chr1	+	154935098
0.0588934	0.713808	sig_UP_in_Aniso	ENSG00000160799	CCDC12	protein_coding	chr3	-	46958125	-0.817226	2.09e-18	-0.223473	0.0657805
0.00238627	-0.0920255	sig_DOWN_in_Aniso	ENSG00000160799	CCDC12	protein_coding	chr3	-	46963219
0.0613587	-0.546205	sig_DOWN_in_Aniso	ENSG00000160908	ZNF394	protein_coding	chr7	-	99088825	0.292784	0.0643266	0.0641293	0.723636
0.0276786	0.179203	sig_UP_in_Aniso	ENSG00000160908	ZNF394	protein_coding	chr7	-	99090868
0.205212	-0.306306	no_significant_change	ENSG00000160959	LRRC14	protein_coding	chr8	+	145747406
0.0975449	0.116394	sig_UP_in_Aniso	ENSG00000160959	LRRC14	protein_coding	chr8	+	145750555
0.00859382	0.106128	sig_UP_in_Aniso	ENSG00000161547	SRSF2	protein_coding	chr17	-	74730199	not detected		not detected
0.00943795	-0.361443	sig_DOWN_in_Aniso	ENSG00000161547	SRSF2	protein_coding	chr17	-	74730795
0.0253747	-0.0742236	sig_DOWN_in_Aniso	ENSG00000161547	SRSF2	protein_coding	chr17	-	74730919
0.00054784	0.519681	sig_UP_in_Aniso	ENSG00000161551	ZNF577	protein_coding	chr19	-	52359055	0.108762	0.220348	-0.139432	0.305425
0.275094	0.519587	no_significant_change	ENSG00000161551	ZNF577	protein_coding	chr19	-	52375254
1.76685e-05	-0.708852	sig_DOWN_in_Aniso	ENSG00000161551	ZNF577	protein_coding	chr19	-	52389908
0.784788	-0.289811	no_significant_change	ENSG00000161551	ZNF577	protein_coding	chr19	-	52392487
0.945513	0.211098	no_significant_change	ENSG00000162377	SELRC1	protein_coding	chr1	-	53150065	-1.44212	1.12e-84	-0.864836	4.69e-05
0.997637	0.0224102	no_significant_change	ENSG00000162377	SELRC1	protein_coding	chr1	-	53150123
0.832905	0.147789	no_significant_change	ENSG00000162377	SELRC1	protein_coding	chr1	-	53152508
0.054766	-0.487961	sig_DOWN_in_Aniso	ENSG00000162377	SELRC1	protein_coding	chr1	-	53153142
6.89131e-13	0.241448	sig_UP_in_Aniso	ENSG00000162783	IER5	protein_coding	chr1	+	181059972	2.28865	3.88e-158	not detected
2.80514e-08	-0.812262	sig_DOWN_in_Aniso	ENSG00000162783	IER5	protein_coding	chr1	+	181061978
0.000340289	-0.750883	sig_DOWN_in_Aniso	ENSG00000162783	IER5	protein_coding	chr1	+	181062035
0.0010501	-0.530548	sig_DOWN_in_Aniso	ENSG00000162783	IER5	protein_coding	chr1	+	181062280
0.771821	-0.055235	no_significant_change	ENSG00000162923	WDR26	protein_coding	chr1	-	224572849	0.150531	0.0134031	0.898198	3.37e-08
0.851332	-0.104802	no_significant_change	ENSG00000162923	WDR26	protein_coding	chr1	-	224573192
0.071803	-0.242676	sig_DOWN_in_Aniso	ENSG00000162923	WDR26	protein_coding	chr1	-	224574696
0.809253	0.00735151	no_significant_change	ENSG00000162923	WDR26	protein_coding	chr1	-	224575544
0.217105	0.10846	no_significant_change	ENSG00000162923	WDR26	protein_coding	chr1	-	224576837
0.889382	-0.0791612	no_significant_change	ENSG00000162923	WDR26	protein_coding	chr1	-	224613907
0.0101905	-0.197398	sig_DOWN_in_Aniso	ENSG00000163002	NUP35	protein_coding	chr2	+	184026407	-0.0117699	0.90809	-0.227689	0.123557
0.0528861	0.744013	sig_UP_in_Aniso	ENSG00000163002	NUP35	protein_coding	chr2	+	184080139
0.0985373	-0.0836456	sig_DOWN_in_Aniso	ENSG00000163900	TMEM41A	protein_coding	chr3	-	185207388	0.111712	0.0818378	0.801873	4.76e-05
0.165928	0.191902	no_significant_change	ENSG00000163900	TMEM41A	protein_coding	chr3	-	185208297
0.989998	-0.108448	no_significant_change	ENSG00000163932	PRKCD	protein_coding	chr3	+	53226653	-0.0314553	0.691499	-0.7043	1.21e-05
0.0696176	-0.495828	sig_DOWN_in_Aniso	ENSG00000163932	PRKCD	protein_coding	chr3	+	53226731
0.92405	0.121535	no_significant_change	ENSG00000163932	PRKCD	protein_coding	chr3	+	53267853
0.0244163	0.73633	sig_UP_in_Aniso	ENSG00000163932	PRKCD	protein_coding	chr3	+	53272328
0.945367	-0.130447	no_significant_change	ENSG00000164167	LSM6	protein_coding	chr4	+	147111064	-0.24488	8.55e-05	0.217832	0.120704
0.630612	-0.150174	no_significant_change	ENSG00000164167	LSM6	protein_coding	chr4	+	147111196
4.48246e-06	1.44027	sig_UP_in_Aniso	ENSG00000164167	LSM6	protein_coding	chr4	+	147125587
0.0953408	-0.254157	sig_DOWN_in_Aniso	ENSG00000164294	GPX8	protein_coding	chr5	+	54460558	not detected		not detected
0.0605503	0.155177	sig_UP_in_Aniso	ENSG00000164294	GPX8	protein_coding	chr5	+	54463122
0.00787078	-0.233996	sig_DOWN_in_Aniso	ENSG00000164363	SLC6A18	protein_coding	chr5	+	1350914	not detected		not detected
0.0264291	1.1627	sig_UP_in_Aniso	ENSG00000164363	SLC6A18	protein_coding	chr5	+	1595364
0.986166	0.0368127	no_significant_change	ENSG00000164543	STK17A	protein_coding	chr7	+	43635569	0.824905	4.32e-15	1.20503	1.32e-07
0.351564	-0.0866412	no_significant_change	ENSG00000164543	STK17A	protein_coding	chr7	+	43664781
0.956635	0.0203905	no_significant_change	ENSG00000164543	STK17A	protein_coding	chr7	+	43665643
0.999592	-0.079136	no_significant_change	ENSG00000164543	STK17A	protein_coding	chr7	+	43665722
5.78862e-05	1.84491	sig_UP_in_Aniso	ENSG00000164543	STK17A	protein_coding	chr7	+	43676297
0.00289119	-0.124183	sig_DOWN_in_Aniso	ENSG00000164919	COX6C	protein_coding	chr8	-	100890376	-0.48935	7.62e-25	-0.155088	0.229412
0.00331488	0.469931	sig_UP_in_Aniso	ENSG00000164919	COX6C	protein_coding	chr8	-	100897949
0.000329871	-0.622583	sig_DOWN_in_Aniso	ENSG00000165494	PCF11	protein_coding	chr11	+	82869921	1.96174	8.3e-33	0.949312	4.89e-09
0.0921328	0.448244	sig_UP_in_Aniso	ENSG00000165494	PCF11	protein_coding	chr11	+	82896247
0.649817	0.0939257	no_significant_change	ENSG00000165494	PCF11	protein_coding	chr11	+	82896830
0.00710727	-0.237408	sig_DOWN_in_Aniso	ENSG00000165688	PMPCA	protein_coding	chr9	+	139318212	-0.329339	0.00393668	-0.135937	0.369447
0.00710727	0.571326	sig_UP_in_Aniso	ENSG00000165688	PMPCA	protein_coding	chr9	+	139322456
0.996337	-0.052481	no_significant_change	ENSG00000166012	TAF1D	protein_coding	chr11	-	93459823	1.60106	2.16e-21	-0.242116	0.232017
0.909803	0.116946	no_significant_change	ENSG00000166012	TAF1D	protein_coding	chr11	-	93463367
0.999592	0.0362252	no_significant_change	ENSG00000166012	TAF1D	protein_coding	chr11	-	93463446
8.92877e-05	-1.05027	sig_DOWN_in_Aniso	ENSG00000166012	TAF1D	protein_coding	chr11	-	93469098
0.981037	0.0796787	no_significant_change	ENSG00000166012	TAF1D	protein_coding	chr11	-	93471471
0.0280886	-0.48463	sig_DOWN_in_Aniso	ENSG00000166532	RIMKLB	protein_coding	chr12	+	8929787	0.192094	0.0262044	-0.919307	3.58e-12
0.00855232	0.260421	sig_UP_in_Aniso	ENSG00000166532	RIMKLB	protein_coding	chr12	+	8935681
1.9021e-17	-0.608325	sig_DOWN_in_Aniso	ENSG00000166669	ATF7IP2	protein_coding	chr16	+	10481596	1.79164	1.48e-44	1.34512	1.2e-10
9.6121e-20	0.443984	sig_UP_in_Aniso	ENSG00000166669	ATF7IP2	protein_coding	chr16	+	10577494
0.0518128	0.581051	sig_UP_in_Aniso	ENSG00000166689	PLEKHA7	protein_coding	chr11	-	16798843	1.14555	1.45e-40	-1.7552	7.64e-31
0.0102767	-0.226272	sig_DOWN_in_Aniso	ENSG00000166689	PLEKHA7	protein_coding	chr11	-	16996186
0.000396781	-0.247244	sig_DOWN_in_Aniso	ENSG00000167113	COQ4	protein_coding	chr9	+	131085859	-0.00335312	0.985884	-0.0678051	0.748573
0.000249924	0.203463	sig_UP_in_Aniso	ENSG00000167113	COQ4	protein_coding	chr9	+	131096349
0.352313	-0.313306	no_significant_change	ENSG00000167173	C15orf39	protein_coding	chr15	+	75501870	0.839505	4.25e-09	-0.188292	0.296429
4.92483e-05	0.215621	sig_UP_in_Aniso	ENSG00000167173	C15orf39	protein_coding	chr15	+	75503861
0.306078	-0.21307	no_significant_change	ENSG00000167173	C15orf39	protein_coding	chr15	+	75503922
0.00125804	-0.123254	sig_DOWN_in_Aniso	ENSG00000167173	C15orf39	protein_coding	chr15	+	75504508
0.998699	-0.023937	no_significant_change	ENSG00000167258	CDK12	protein_coding	chr17	+	37618709	-0.0970695	0.287177	0.377927	0.00172442
0.978144	-0.0917513	no_significant_change	ENSG00000167258	CDK12	protein_coding	chr17	+	37688526
0.979543	-0.0767483	no_significant_change	ENSG00000167258	CDK12	protein_coding	chr17	+	37689802
0.929706	-0.246204	no_significant_change	ENSG00000167258	CDK12	protein_coding	chr17	+	37690281
0.994396	-0.0921247	no_significant_change	ENSG00000167258	CDK12	protein_coding	chr17	+	37690796
0.999208	-0.117787	no_significant_change	ENSG00000167258	CDK12	protein_coding	chr17	+	37716110
7.81011e-09	1.74709	sig_UP_in_Aniso	ENSG00000167258	CDK12	protein_coding	chr17	+	37723812
0.837541	-0.180554	no_significant_change	ENSG00000167280	ENGASE	protein_coding	chr17	+	77082776	0.297382	0.0108676	-0.516292	0.00282361
0.998637	-0.0596858	no_significant_change	ENSG00000167280	ENGASE	protein_coding	chr17	+	77084679
0.0358993	1.032	sig_UP_in_Aniso	ENSG00000167280	ENGASE	protein_coding	chr17	+	77088049
0.811872	-0.335697	no_significant_change	ENSG00000167380	ZNF226	protein_coding	chr19	+	44676912	0.269114	0.00689549	0.206189	0.126836
0.177741	-0.154355	no_significant_change	ENSG00000167380	ZNF226	protein_coding	chr19	+	44679401
0.985027	-0.0928859	no_significant_change	ENSG00000167380	ZNF226	protein_coding	chr19	+	44679582
0.702182	-0.389931	no_significant_change	ENSG00000167380	ZNF226	protein_coding	chr19	+	44679883
0.99302	0.0429557	no_significant_change	ENSG00000167380	ZNF226	protein_coding	chr19	+	44680012
0.340406	0.111368	no_significant_change	ENSG00000167380	ZNF226	protein_coding	chr19	+	44681836
0.000578218	0.828925	sig_UP_in_Aniso	ENSG00000167380	ZNF226	protein_coding	chr19	+	44703641
0.158517	0.279554	no_significant_change	ENSG00000167522	ANKRD11	protein_coding	chr16	-	89334040	0.121997	0.186482	0.0462932	0.70055
0.929706	0.101622	no_significant_change	ENSG00000167522	ANKRD11	protein_coding	chr16	-	89349735
0.998699	0.0149447	no_significant_change	ENSG00000167522	ANKRD11	protein_coding	chr16	-	89349789
0.0212791	-0.328868	sig_DOWN_in_Aniso	ENSG00000167522	ANKRD11	protein_coding	chr16	-	89353072
0.99302	0.0408336	no_significant_change	ENSG00000167522	ANKRD11	protein_coding	chr16	-	89365282
0.978144	-0.0157855	no_significant_change	ENSG00000167595	C19orf55	protein_coding	chr19	+	36261923	-0.0680363	0.626008	-0.347025	0.0428192
0.826859	0.091799	no_significant_change	ENSG00000167595	C19orf55	protein_coding	chr19	+	36262072
0.996337	-0.041426	no_significant_change	ENSG00000167595	C19orf55	protein_coding	chr19	+	36262299
0.0588934	-0.802864	sig_DOWN_in_Aniso	ENSG00000167595	C19orf55	protein_coding	chr19	+	36262875
0.439608	0.895641	no_significant_change	ENSG00000167595	C19orf55	protein_coding	chr19	+	36264395
0.0193416	0.791366	sig_UP_in_Aniso	ENSG00000167774	NDUFA7	protein_coding	chr19	-	8373482	-0.414267	7.15e-05	-0.187842	0.388007
0.750765	-0.0348738	no_significant_change	ENSG00000167774	NDUFA7	protein_coding	chr19	-	8376243
0.486642	-0.516215	no_significant_change	ENSG00000167774	NDUFA7	protein_coding	chr19	-	8376303
2.70204e-05	-0.0717671	sig_DOWN_in_Aniso	ENSG00000167792	NDUFV1	protein_coding	chr11	+	67380005	-0.108437	0.410214	-0.514055	0.0119583
0.003763	1.05438	sig_UP_in_Aniso	ENSG00000167792	NDUFV1	protein_coding	chr11	+	67394863
0.9681	0.00732298	no_significant_change	ENSG00000167969	ECI1	protein_coding	chr16	-	2289404	-0.213835	0.281432	0.451178	2.92e-05
0.0414105	-0.0802747	sig_DOWN_in_Aniso	ENSG00000167969	ECI1	protein_coding	chr16	-	2289898
0.017011	0.345812	sig_UP_in_Aniso	ENSG00000167969	ECI1	protein_coding	chr16	-	2291678
0.99302	-0.0270644	no_significant_change	ENSG00000167969	ECI1	protein_coding	chr16	-	2292595
0.998637	0.0301307	no_significant_change	ENSG00000168116	KIAA1586	protein_coding	chr6	+	56918616	-0.575202	6.3e-06	-0.281165	0.098571
0.486703	-0.199019	no_significant_change	ENSG00000168116	KIAA1586	protein_coding	chr6	+	56920021
0.19125	-0.324485	no_significant_change	ENSG00000168116	KIAA1586	protein_coding	chr6	+	56923837
0.00763444	0.743444	sig_UP_in_Aniso	ENSG00000168116	KIAA1586	protein_coding	chr6	+	56948753
0.000580274	0.555139	sig_UP_in_Aniso	ENSG00000168818	STX18	protein_coding	chr4	-	4420696	0.442698	1.36e-09	-0.165486	0.17896
4.74095e-05	-0.219058	sig_DOWN_in_Aniso	ENSG00000168818	STX18	protein_coding	chr4	-	4421201
2.43517e-05	13.5042	sig_UP_in_Aniso	ENSG00000169045	HNRNPH1	protein_coding	chr5	-	179032317	0.665144	1.08e-06	0.677349	0.000108721
0.792519	-0.0206609	no_significant_change	ENSG00000169045	HNRNPH1	protein_coding	chr5	-	179041178
0.889382	0.043448	no_significant_change	ENSG00000169045	HNRNPH1	protein_coding	chr5	-	179041414
0.998637	0.0266443	no_significant_change	ENSG00000169684	CHRNA5	protein_coding	chr15	+	78882539	-0.158382	0.0167075	0.56011	0.0101501
0.981141	0.0324859	no_significant_change	ENSG00000169684	CHRNA5	protein_coding	chr15	+	78882593
0.998637	-0.0231518	no_significant_change	ENSG00000169684	CHRNA5	protein_coding	chr15	+	78883964
0.893734	-0.262082	no_significant_change	ENSG00000169684	CHRNA5	protein_coding	chr15	+	78884160
0.945513	-0.120653	no_significant_change	ENSG00000169684	CHRNA5	protein_coding	chr15	+	78884309
0.954341	0.206792	no_significant_change	ENSG00000169684	CHRNA5	protein_coding	chr15	+	78885831
0.388769	-0.289923	no_significant_change	ENSG00000169684	CHRNA5	protein_coding	chr15	+	78885915
0.79982	-0.218834	no_significant_change	ENSG00000169684	CHRNA5	protein_coding	chr15	+	78886038
0.998637	0.0231639	no_significant_change	ENSG00000169684	CHRNA5	protein_coding	chr15	+	78886465
5.71125e-08	2.12304	sig_UP_in_Aniso	ENSG00000169684	CHRNA5	protein_coding	chr15	+	78895249
0.415965	-0.0920534	no_significant_change	ENSG00000169895	SYAP1	protein_coding	chrX	+	16778556	0.547487	4.3e-05	1.16366	9.73e-11
0.951921	-0.182639	no_significant_change	ENSG00000169895	SYAP1	protein_coding	chrX	+	16778617
0.826768	-0.274933	no_significant_change	ENSG00000169895	SYAP1	protein_coding	chrX	+	16778817
0.99501	-0.0104664	no_significant_change	ENSG00000169895	SYAP1	protein_coding	chrX	+	16779025
0.0669453	0.230723	sig_UP_in_Aniso	ENSG00000169895	SYAP1	protein_coding	chrX	+	16779591
0.992144	0.00527729	no_significant_change	ENSG00000169895	SYAP1	protein_coding	chrX	+	16779952
0.997295	0.00125747	no_significant_change	ENSG00000169895	SYAP1	protein_coding	chrX	+	16780451
0.350896	0.164282	no_significant_change	ENSG00000169895	SYAP1	protein_coding	chrX	+	16780576
0.762944	0.0705828	no_significant_change	ENSG00000169895	SYAP1	protein_coding	chrX	+	16780642
0.880211	0.0759971	no_significant_change	ENSG00000169895	SYAP1	protein_coding	chrX	+	16780804
0.9681	-0.104885	no_significant_change	ENSG00000169895	SYAP1	protein_coding	chrX	+	16783457
0.993005	0.0356765	no_significant_change	ENSG00000169895	SYAP1	protein_coding	chrX	+	16783669
0.925356	-0.245782	no_significant_change	ENSG00000169895	SYAP1	protein_coding	chrX	+	16785318
0.127034	-0.528081	no_significant_change	ENSG00000169933	FRMPD4	protein_coding	chrX	+	12735506	0.406611	3e-05	-0.82088	8.83e-06
0.0429499	0.217836	sig_UP_in_Aniso	ENSG00000169933	FRMPD4	protein_coding	chrX	+	12741241
0.0272107	-0.407856	sig_DOWN_in_Aniso	ENSG00000169967	MAP3K2	protein_coding	chr2	-	128056243	-0.593476	7.78e-11	-1.20928	3.1e-16
0.179409	0.218182	no_significant_change	ENSG00000169967	MAP3K2	protein_coding	chr2	-	128061921
0.873169	0.314467	no_significant_change	ENSG00000169967	MAP3K2	protein_coding	chr2	-	128063770
0.00649038	-0.355285	sig_DOWN_in_Aniso	ENSG00000170468	AC005280.1	ncRNA	chr14	+	73960098	not detected		not detected
0.00649038	1.11884	sig_UP_in_Aniso	ENSG00000170468	AC005280.1	ncRNA	chr14	+	73971958
0.000158343	-1.02256	sig_DOWN_in_Aniso	ENSG00000170525	PFKFB3	protein_coding	chr10	+	6212830	1.80723	4.07e-109	0.45709	0.00168674
0.000158343	0.41192	sig_UP_in_Aniso	ENSG00000170525	PFKFB3	protein_coding	chr10	+	6277494
0.0020786	0.87414	sig_UP_in_Aniso	ENSG00000170619	COMMD5	protein_coding	chr8	-	146063363	-0.50616	6.24e-05	-0.139552	0.486375
0.942831	-0.0880244	no_significant_change	ENSG00000170619	COMMD5	protein_coding	chr8	-	146075561
0.945513	-0.0985102	no_significant_change	ENSG00000170619	COMMD5	protein_coding	chr8	-	146075839
0.0392852	0.174279	sig_UP_in_Aniso	ENSG00000170653	ATF7	protein_coding	chr12	-	53905843	not detected		not detected
0.0528836	-0.224254	sig_DOWN_in_Aniso	ENSG00000170653	ATF7	protein_coding	chr12	-	53936673
0.100621	-0.42732	no_significant_change	ENSG00000170734	POLH	protein_coding	chr6	+	43559763	0.87357	3.03e-10	1.08896	1.76e-09
0.0217892	0.427403	sig_UP_in_Aniso	ENSG00000170734	POLH	protein_coding	chr6	+	43582256
0.968271	-0.0821543	no_significant_change	ENSG00000170734	POLH	protein_coding	chr6	+	43584518
0.0160944	-0.226639	sig_DOWN_in_Aniso	ENSG00000171456	ASXL1	protein_coding	chr20	+	30960034	0.0657302	0.471474	-0.41164	0.00292158
0.998699	-0.020678	no_significant_change	ENSG00000171456	ASXL1	protein_coding	chr20	+	30960354
0.29247	0.122195	no_significant_change	ENSG00000171456	ASXL1	protein_coding	chr20	+	31025158
0.91131	0.202432	no_significant_change	ENSG00000171456	ASXL1	protein_coding	chr20	+	31026167
0.471165	0.187577	no_significant_change	ENSG00000171456	ASXL1	protein_coding	chr20	+	31026218
0.998637	-0.000295727	no_significant_change	ENSG00000171456	ASXL1	protein_coding	chr20	+	31026796
0.984263	0.00227321	no_significant_change	ENSG00000171456	ASXL1	protein_coding	chr20	+	31027121
0.99302	0.0508536	no_significant_change	ENSG00000171681	ATF7IP	protein_coding	chr12	+	14651173	0.446117	8.59e-05	0.676974	0.000109597
0.0467947	0.199915	sig_UP_in_Aniso	ENSG00000171681	ATF7IP	protein_coding	chr12	+	14651225
0.999592	-0.0037496	no_significant_change	ENSG00000171681	ATF7IP	protein_coding	chr12	+	14655585
0.00940102	-0.263099	sig_DOWN_in_Aniso	ENSG00000171681	ATF7IP	protein_coding	chr12	+	14655862
0.0893914	-0.139793	sig_DOWN_in_Aniso	ENSG00000171703	TCEA2	protein_coding	chr20	+	62695475	-0.141274	0.48251	-1.32431	4.48e-05
0.994396	0.0433875	no_significant_change	ENSG00000171703	TCEA2	protein_coding	chr20	+	62695530
0.14836	0.109182	no_significant_change	ENSG00000171703	TCEA2	protein_coding	chr20	+	62703699
0.306547	-0.376471	no_significant_change	ENSG00000171735	CAMTA1	protein_coding	chr1	+	6932018	-0.215239	0.000436212	-0.0180994	0.886173
0.701041	-0.0940827	no_significant_change	ENSG00000171735	CAMTA1	protein_coding	chr1	+	6932072
0.794319	-0.130944	no_significant_change	ENSG00000171735	CAMTA1	protein_coding	chr1	+	6932127
0.956296	0.036901	no_significant_change	ENSG00000171735	CAMTA1	protein_coding	chr1	+	6948259
5.78862e-05	0.57158	sig_UP_in_Aniso	ENSG00000171735	CAMTA1	protein_coding	chr1	+	7827903
0.987941	-0.107226	no_significant_change	ENSG00000171735	CAMTA1	protein_coding	chr1	+	7829763
0.00110441	-0.542221	sig_DOWN_in_Aniso	ENSG00000172201	ID4	protein_coding	chr6	+	19839642	1.50156	2.36e-91	1.33595	2.67e-06
0.999208	0.124709	no_significant_change	ENSG00000172201	ID4	protein_coding	chr6	+	19840564
0.418579	0.0844326	no_significant_change	ENSG00000172201	ID4	protein_coding	chr6	+	19840914
0.857766	0.0059894	no_significant_change	ENSG00000172201	ID4	protein_coding	chr6	+	19842424
0.000264792	-0.370584	sig_DOWN_in_Aniso	ENSG00000172530	BANP	protein_coding	chr16	+	87986353	0.519619	5.41e-06	-0.32576	0.0532719
5.98002e-05	0.224766	sig_UP_in_Aniso	ENSG00000172530	BANP	protein_coding	chr16	+	88110921
0.0129259	0.512714	sig_UP_in_Aniso	ENSG00000172840	PDP2	protein_coding	chr16	+	66920400	-1.15272	8.38e-41	-0.866769	3.01e-07
0.0135752	-0.606632	sig_DOWN_in_Aniso	ENSG00000172840	PDP2	protein_coding	chr16	+	66921105
3.67672e-08	1.07567	sig_UP_in_Aniso	ENSG00000172922	RNASEH2C	protein_coding	chr11	-	65482471	-0.0951318	0.62492	not detected
0.679929	-0.0174801	no_significant_change	ENSG00000172922	RNASEH2C	protein_coding	chr11	-	65485146
0.0705568	-0.129291	sig_DOWN_in_Aniso	ENSG00000172922	RNASEH2C	protein_coding	chr11	-	65487154
0.0495368	0.407826	sig_UP_in_Aniso	ENSG00000173145	NOC3L	protein_coding	chr10	-	96081588	0.370703	0.00627984	-0.0383894	0.76015
0.0292379	-0.259493	sig_DOWN_in_Aniso	ENSG00000173145	NOC3L	protein_coding	chr10	-	96088113
0.166761	-0.409005	no_significant_change	ENSG00000175073	VCPIP1	protein_coding	chr8	-	67542488	0.565547	2.56e-20	0.548954	0.000209207
0.0650356	0.176061	sig_UP_in_Aniso	ENSG00000175073	VCPIP1	protein_coding	chr8	-	67545468
0.0702829	0.220646	sig_UP_in_Aniso	ENSG00000175376	EIF1AD	protein_coding	chr11	-	65764015	0.0422736	0.605469	0.117059	0.629311
0.0615922	-0.193523	sig_DOWN_in_Aniso	ENSG00000175376	EIF1AD	protein_coding	chr11	-	65765894
0.167897	0.23303	no_significant_change	ENSG00000175866	BAIAP2	protein_coding	chr17	+	79083172	1.46027	5.38e-27	1.57148	7.93e-08
3.3302e-05	0.230481	sig_UP_in_Aniso	ENSG00000175866	BAIAP2	protein_coding	chr17	+	79084312
1.68987e-11	-0.458919	sig_DOWN_in_Aniso	ENSG00000175866	BAIAP2	protein_coding	chr17	+	79090024
0.615429	0.395858	no_significant_change	ENSG00000176401	EID2B	protein_coding	chr19	-	39935215	-2.17081	1.56e-152	not detected
0.357045	0.229263	no_significant_change	ENSG00000176401	EID2B	protein_coding	chr19	-	40021628
0.0363214	-0.284619	sig_DOWN_in_Aniso	ENSG00000176401	EID2B	protein_coding	chr19	-	40022179
0.993928	-0.00974387	no_significant_change	ENSG00000176933	TOB2P1	ncRNA	chr6	-	28046568	-0.150974	0.169239	not detected
0.0995738	-0.144971	sig_DOWN_in_Aniso	ENSG00000176933	TOB2P1	ncRNA	chr6	-	28090784
0.235484	0.196786	no_significant_change	ENSG00000176933	TOB2P1	ncRNA	chr6	-	28183114
0.630612	0.143086	no_significant_change	ENSG00000176933	TOB2P1	ncRNA	chr6	-	28185354
0.00323479	0.116127	sig_UP_in_Aniso	ENSG00000177051	FBXO46	protein_coding	chr19	-	46213882	-0.0245898	0.90399	-0.717581	0.00118118
0.0538628	-0.819504	sig_DOWN_in_Aniso	ENSG00000177051	FBXO46	protein_coding	chr19	-	46217643
0.0236632	-0.264671	sig_DOWN_in_Aniso	ENSG00000177192	PUS1	protein_coding	chr12	+	132419468	0.423845	1.67e-06	0.104519	0.586701
0.00682306	0.0981256	sig_UP_in_Aniso	ENSG00000177192	PUS1	protein_coding	chr12	+	132428402
1.24027e-12	-0.499788	sig_DOWN_in_Aniso	ENSG00000177733	HNRNPA0	protein_coding	chr5	-	137086122	-0.758414	1.75e-11	not detected
1.39078e-05	-0.247218	sig_DOWN_in_Aniso	ENSG00000177733	HNRNPA0	protein_coding	chr5	-	137087073
0.0178081	-0.0247998	sig_DOWN_in_Aniso	ENSG00000177733	HNRNPA0	protein_coding	chr5	-	137087261
0.999592	0.307303	no_significant_change	ENSG00000177733	HNRNPA0	protein_coding	chr5	-	137087927
2.44977e-06	0.184117	sig_UP_in_Aniso	ENSG00000177733	HNRNPA0	protein_coding	chr5	-	137088305
0.00271094	0.199805	sig_UP_in_Aniso	ENSG00000178252	WDR6	protein_coding	chr3	+	49044547	-1.09075	2.08e-26	-0.346982	0.11356
0.00136359	-0.124841	sig_DOWN_in_Aniso	ENSG00000178252	WDR6	protein_coding	chr3	+	49053384
0.0997776	0.10202	sig_UP_in_Aniso	ENSG00000178425	NT5DC1	protein_coding	chr6	+	116565379	-0.364119	5.98e-13	-0.178533	0.308909
0.301531	-0.390951	no_significant_change	ENSG00000178425	NT5DC1	protein_coding	chr6	+	116570659
0.998699	0.0205307	no_significant_change	ENSG00000178538	CA8	protein_coding	chr8	-	61099905	0.303478	0.00815529	1.03119	7.01e-07
0.307648	0.351901	no_significant_change	ENSG00000178538	CA8	protein_coding	chr8	-	61100664
0.0140472	-0.418056	sig_DOWN_in_Aniso	ENSG00000178538	CA8	protein_coding	chr8	-	61101531
0.942617	0.0837711	no_significant_change	ENSG00000178538	CA8	protein_coding	chr8	-	61102101
0.753937	0.297523	no_significant_change	ENSG00000178538	CA8	protein_coding	chr8	-	61102217
0.162759	0.248956	no_significant_change	ENSG00000179387	ELMOD2	protein_coding	chr4	+	141471497	-0.582566	1.67e-10	-0.396216	0.0035021
0.0705568	-0.0894691	sig_DOWN_in_Aniso	ENSG00000179387	ELMOD2	protein_coding	chr4	+	141474924
0.0553459	-0.507465	sig_DOWN_in_Aniso	ENSG00000179409	GEMIN4	protein_coding	chr17	-	647659	-1.30131	4e-26	-0.507337	0.00386371
0.998699	0.0788199	no_significant_change	ENSG00000179409	GEMIN4	protein_coding	chr17	-	647796
0.650583	0.0732693	no_significant_change	ENSG00000179409	GEMIN4	protein_coding	chr17	-	647862
0.13121	-0.664198	no_significant_change	ENSG00000180233	ZNRF2	protein_coding	chr7	+	30406642	-0.403972	2.33e-07	0.519169	0.000542242
0.0386609	0.163019	sig_UP_in_Aniso	ENSG00000180233	ZNRF2	protein_coding	chr7	+	30412408
0.736712	-0.390834	no_significant_change	ENSG00000180573	HIST1H2AC	protein_coding	chr6	+	26138601	3.65621	4.02e-137	1.1503	0.015707
0.195915	-0.154048	no_significant_change	ENSG00000180573	HIST1H2AC	protein_coding	chr6	+	26139183
0.0155897	0.40345	sig_UP_in_Aniso	ENSG00000180573	HIST1H2AC	protein_coding	chr6	+	26139336
0.043793	-0.273584	sig_DOWN_in_Aniso	ENSG00000180694	TMEM64	protein_coding	chr8	-	91634227	-1.08653	1.6e-35	-0.614839	7.13e-06
0.0953738	0.461192	sig_UP_in_Aniso	ENSG00000180694	TMEM64	protein_coding	chr8	-	91635772
0.846614	-0.11978	no_significant_change	ENSG00000181007	ZFP82	protein_coding	chr19	-	36874021	-0.0355423	0.701655	-0.934702	2.43e-09
0.979543	-0.0902832	no_significant_change	ENSG00000181007	ZFP82	protein_coding	chr19	-	36874109
0.997401	-0.12695	no_significant_change	ENSG00000181007	ZFP82	protein_coding	chr19	-	36880566
0.993928	0.00638897	no_significant_change	ENSG00000181007	ZFP82	protein_coding	chr19	-	36881250
0.999592	-0.0134859	no_significant_change	ENSG00000181007	ZFP82	protein_coding	chr19	-	36882861
0.0956493	0.580376	sig_UP_in_Aniso	ENSG00000181007	ZFP82	protein_coding	chr19	-	36883518
0.00219875	-0.566264	sig_DOWN_in_Aniso	ENSG00000181666	HKR1	protein_coding	chr19	+	37820611	0.832907	5.76e-41	-0.0181951	0.907234
0.000248119	0.1369	sig_UP_in_Aniso	ENSG00000181666	HKR1	protein_coding	chr19	+	37855348
0.0362483	0.322995	sig_UP_in_Aniso	ENSG00000182196	ARL6IP4	protein_coding	chr12	+	123464591	not detected		not detected
0.00752914	-0.0872568	sig_DOWN_in_Aniso	ENSG00000182196	ARL6IP4	protein_coding	chr12	+	123467456
0.365669	-0.1503	no_significant_change	ENSG00000182287	AP1S2	protein_coding	chrX	-	15843929	0.140926	0.157712	0.818971	4.53e-05
0.819012	-0.0780521	no_significant_change	ENSG00000182287	AP1S2	protein_coding	chrX	-	15844194
0.0284968	0.171266	sig_UP_in_Aniso	ENSG00000182287	AP1S2	protein_coding	chrX	-	15848181
0.776701	0.273972	no_significant_change	ENSG00000182372	CLN8	protein_coding	chr8	+	1728933	-1.03549	3.87e-60	0.0586234	0.819974
0.880211	0.132094	no_significant_change	ENSG00000182372	CLN8	protein_coding	chr8	+	1730864
0.991788	-0.0697012	no_significant_change	ENSG00000182372	CLN8	protein_coding	chr8	+	1730956
0.072386	-0.781447	sig_DOWN_in_Aniso	ENSG00000182372	CLN8	protein_coding	chr8	+	1734735
0.757498	0.0710601	no_significant_change	ENSG00000182759	MAFA	protein_coding	chr8	-	144510234	2.26777	5.21e-33	1.34356	0.0037106
0.998637	0.0780137	no_significant_change	ENSG00000182759	MAFA	protein_coding	chr8	-	144510533
0.0725835	-0.687646	sig_DOWN_in_Aniso	ENSG00000182759	MAFA	protein_coding	chr8	-	144510650
0.786303	0.363519	no_significant_change	ENSG00000182759	MAFA	protein_coding	chr8	-	144511018
0.294298	-0.49102	no_significant_change	ENSG00000182831	C16orf72	protein_coding	chr16	+	9197397	1.07609	1.83e-121	0.754199	3.63e-05
0.0145546	-0.404597	sig_DOWN_in_Aniso	ENSG00000182831	C16orf72	protein_coding	chr16	+	9200618
0.0010251	-0.282372	sig_DOWN_in_Aniso	ENSG00000182831	C16orf72	protein_coding	chr16	+	9207037
2.70204e-05	0.390396	sig_UP_in_Aniso	ENSG00000182831	C16orf72	protein_coding	chr16	+	9211387
0.999592	-0.0441314	no_significant_change	ENSG00000182831	C16orf72	protein_coding	chr16	+	9211920
0.78809	0.180583	no_significant_change	ENSG00000182831	C16orf72	protein_coding	chr16	+	9212432
0.162151	0.458991	no_significant_change	ENSG00000182831	C16orf72	protein_coding	chr16	+	9212578
0.777767	0.0733765	no_significant_change	ENSG00000182831	C16orf72	protein_coding	chr16	+	9212933
0.785488	0.0857927	no_significant_change	ENSG00000182831	C16orf72	protein_coding	chr16	+	9213554
0.000128246	-0.0427813	sig_DOWN_in_Aniso	ENSG00000183207	RUVBL2	protein_coding	chr19	+	49519182	-0.324459	0.0204427	-0.410874	0.044823
0.0133716	0.915273	sig_UP_in_Aniso	ENSG00000183207	RUVBL2	protein_coding	chr19	+	49521121
0.000578218	0.158639	sig_UP_in_Aniso	ENSG00000183337	BCOR	protein_coding	chrX	-	39910508	0.603834	2.09e-14	0.244977	0.164813
0.00439548	-0.387026	sig_DOWN_in_Aniso	ENSG00000183337	BCOR	protein_coding	chrX	-	39931167
1.32015e-05	-0.113167	sig_DOWN_in_Aniso	ENSG00000183741	CBX6	protein_coding	chr22	-	39257467	-2.2153	1.63e-75	-1.79515	1.24e-20
0.000749715	0.495453	sig_UP_in_Aniso	ENSG00000183741	CBX6	protein_coding	chr22	-	39260350
0.976591	0.0201032	no_significant_change	ENSG00000184005	ST6GALNAC3	protein_coding	chr1	+	76619284	-0.0387537	0.624618	-0.0381745	0.851982
0.712187	0.21792	no_significant_change	ENSG00000184005	ST6GALNAC3	protein_coding	chr1	+	77042890
0.00181305	-0.32641	sig_DOWN_in_Aniso	ENSG00000184005	ST6GALNAC3	protein_coding	chr1	+	77096632
0.000114589	1.40926	sig_UP_in_Aniso	ENSG00000184005	ST6GALNAC3	protein_coding	chr1	+	77108519
0.0175272	0.222372	sig_UP_in_Aniso	ENSG00000184207	PGP	protein_coding	chr16	-	2261997	-0.24014	0.165393	-0.210411	0.530359
0.999592	-0.109289	no_significant_change	ENSG00000184207	PGP	protein_coding	chr16	-	2263049
0.016897	-0.0917673	sig_DOWN_in_Aniso	ENSG00000184207	PGP	protein_coding	chr16	-	2263684
0.0926031	1.07994	sig_UP_in_Aniso	ENSG00000184277	TM2D3	protein_coding	chr15	-	102143829	-0.661109	2.02e-17	0.0195997	0.899103
0.118084	1.06854	no_significant_change	ENSG00000184277	TM2D3	protein_coding	chr15	-	102149302
0.164585	-0.376386	no_significant_change	ENSG00000184277	TM2D3	protein_coding	chr15	-	102173462
0.994396	-0.0438506	no_significant_change	ENSG00000184277	TM2D3	protein_coding	chr15	-	102182052
0.905568	0.133301	no_significant_change	ENSG00000184277	TM2D3	protein_coding	chr15	-	102182126
0.994396	0.0312324	no_significant_change	ENSG00000184277	TM2D3	protein_coding	chr15	-	102182520
0.444499	-0.12908	no_significant_change	ENSG00000184349	EFNA5	protein_coding	chr5	-	106712589	-0.101481	0.247236	0.0601702	0.776157
0.187056	-0.56694	no_significant_change	ENSG00000184349	EFNA5	protein_coding	chr5	-	106712700
0.0312232	0.324073	sig_UP_in_Aniso	ENSG00000184349	EFNA5	protein_coding	chr5	-	106713817
0.993928	-0.044402	no_significant_change	ENSG00000184349	EFNA5	protein_coding	chr5	-	106713905
0.889382	0.0978124	no_significant_change	ENSG00000184349	EFNA5	protein_coding	chr5	-	106715737
0.168402	-0.187936	no_significant_change	ENSG00000185262	FAM100B	protein_coding	chr17	+	74266786	0.454922	0.00728635	0.755962	0.000612096
0.0956493	0.0815192	sig_UP_in_Aniso	ENSG00000185262	FAM100B	protein_coding	chr17	+	74267373
0.0696176	12.3151	sig_UP_in_Aniso	ENSG00000185338	SOCS1	protein_coding	chr16	-	11342958	0.543676	0.0521794	0.474757	0.28456
0.0703131	-0.00465122	sig_DOWN_in_Aniso	ENSG00000185338	SOCS1	protein_coding	chr16	-	11347964
0.0979439	-0.615604	sig_DOWN_in_Aniso	ENSG00000185352	HS6ST3	protein_coding	chr13	+	96757320	-0.0345739	0.757055	0.119024	0.570614
0.0322033	0.258519	sig_UP_in_Aniso	ENSG00000185352	HS6ST3	protein_coding	chr13	+	97491814
0.999592	-0.0625492	no_significant_change	ENSG00000185684	EP400NL	protein_coding	chr12	+	132570325	0.882146	1.01e-16	0.0742104	0.687439
0.174733	-0.108222	no_significant_change	ENSG00000185684	EP400NL	protein_coding	chr12	+	132593443
0.0011214	1.55523	sig_UP_in_Aniso	ENSG00000185684	EP400NL	protein_coding	chr12	+	132616183
0.00752001	-0.0926489	sig_DOWN_in_Aniso	ENSG00000185721	DRG1	protein_coding	chr22	+	31830171	-0.493632	1.49e-12	0.0189559	0.903048
0.982718	-0.125622	no_significant_change	ENSG00000185721	DRG1	protein_coding	chr22	+	31830305
0.183721	0.239485	no_significant_change	ENSG00000185721	DRG1	protein_coding	chr22	+	31834364
4.03347e-10	1.89504	sig_UP_in_Aniso	ENSG00000185721	DRG1	protein_coding	chr22	+	31860189
0.816855	0.332031	no_significant_change	ENSG00000185818	NAT8L	protein_coding	chr4	+	2066807	-1.43423	1.28e-15	-1.1661	1.34e-09
7.88617e-08	0.307406	sig_UP_in_Aniso	ENSG00000185818	NAT8L	protein_coding	chr4	+	2067635
1.72048e-09	-0.417038	sig_DOWN_in_Aniso	ENSG00000185818	NAT8L	protein_coding	chr4	+	2070815
4.25529e-09	0.41586	sig_UP_in_Aniso	ENSG00000185917	SETD4	protein_coding	chr21	-	37406838	1.02349	5.78e-20	-0.582019	6.52e-07
0.96469	0.142269	no_significant_change	ENSG00000185917	SETD4	protein_coding	chr21	-	37407241
9.60135e-11	-0.684718	sig_DOWN_in_Aniso	ENSG00000185917	SETD4	protein_coding	chr21	-	37415982
0.0615922	-0.134134	sig_DOWN_in_Aniso	ENSG00000186184	POLR1D	protein_coding	chr13	+	28197583	-0.637898	3.16e-23	-0.477533	2.59e-05
0.371052	0.203026	no_significant_change	ENSG00000186184	POLR1D	protein_coding	chr13	+	28240387
0.875116	0.0718915	no_significant_change	ENSG00000186184	POLR1D	protein_coding	chr13	+	28240463
0.370369	0.122935	no_significant_change	ENSG00000186184	POLR1D	protein_coding	chr13	+	28241547
0.216945	-0.105047	no_significant_change	ENSG00000186567	CEACAM19	protein_coding	chr19	+	45166849	not detected
0.79982	0.0141343	no_significant_change	ENSG00000186567	CEACAM19	protein_coding	chr19	+	45169426
0.00149703	0.705354	sig_UP_in_Aniso	ENSG00000186567	CEACAM19	protein_coding	chr19	+	45187625
1.12633e-05	0.164975	sig_UP_in_Aniso	ENSG00000187531	SIRT7	protein_coding	chr17	-	79869813	0.822643	2.83e-27	0.182249	0.583578
0.000330283	-0.479836	sig_DOWN_in_Aniso	ENSG00000187531	SIRT7	protein_coding	chr17	-	79876145
0.0623775	-0.229769	sig_DOWN_in_Aniso	ENSG00000187555	USP7	protein_coding	chr16	-	8985955	-0.357307	2.95e-07	-0.264489	0.0709993
0.906785	0.0560923	no_significant_change	ENSG00000187555	USP7	protein_coding	chr16	-	8986631
0.964534	0.092024	no_significant_change	ENSG00000187555	USP7	protein_coding	chr16	-	8987262
0.298098	0.218852	no_significant_change	ENSG00000187555	USP7	protein_coding	chr16	-	8987651
0.494459	0.360237	no_significant_change	ENSG00000187741	FANCA	protein_coding	chr16	-	89799683	0.968131	1.18e-61	-0.651	1.76e-05
0.319854	0.361425	no_significant_change	ENSG00000187741	FANCA	protein_coding	chr16	-	89801760
0.240151	0.200174	no_significant_change	ENSG00000187741	FANCA	protein_coding	chr16	-	89803957
0.993928	0.0123524	no_significant_change	ENSG00000187741	FANCA	protein_coding	chr16	-	89804809
0.954821	0.021358	no_significant_change	ENSG00000187741	FANCA	protein_coding	chr16	-	89804861
0.803472	0.0445019	no_significant_change	ENSG00000187741	FANCA	protein_coding	chr16	-	89804914
0.040996	-0.212849	sig_DOWN_in_Aniso	ENSG00000187741	FANCA	protein_coding	chr16	-	89864762
0.991788	-0.120455	no_significant_change	ENSG00000187741	FANCA	protein_coding	chr16	-	89864832
0.889382	-0.216447	no_significant_change	ENSG00000188033	ZNF490	protein_coding	chr19	-	12686816	1.07325	1.73e-35	0.426473	0.0120269
0.125978	-0.37423	no_significant_change	ENSG00000188033	ZNF490	protein_coding	chr19	-	12686915
0.00394504	0.613501	sig_UP_in_Aniso	ENSG00000188033	ZNF490	protein_coding	chr19	-	12688766
0.0702829	-0.159664	sig_DOWN_in_Aniso	ENSG00000188807	TMEM201	protein_coding	chr1	+	9665006	-0.204213	0.209844	-0.584102	0.000126698
0.0551043	0.118562	sig_UP_in_Aniso	ENSG00000188807	TMEM201	protein_coding	chr1	+	9674935
0.0528836	0.172323	sig_UP_in_Aniso	ENSG00000188895	MSL1	protein_coding	chr17	+	38286547	-1.10272	1.28e-36	-1.03646	4.4e-07
0.0965256	-0.297666	sig_DOWN_in_Aniso	ENSG00000188895	MSL1	protein_coding	chr17	+	38293040
0.763747	-0.382644	no_significant_change	ENSG00000189057	FAM111B	protein_coding	chr11	+	58891819	1.42315	2.96e-12	1.25729	7.13e-08
0.978144	-0.0315792	no_significant_change	ENSG00000189057	FAM111B	protein_coding	chr11	+	58894883
0.998699	-0.0159477	no_significant_change	ENSG00000189057	FAM111B	protein_coding	chr11	+	58894934
0.0705881	0.585479	sig_UP_in_Aniso	ENSG00000189057	FAM111B	protein_coding	chr11	+	58895851
0.0783977	-0.0483327	sig_DOWN_in_Aniso	ENSG00000196182	STK40	protein_coding	chr1	-	36805229	0.102269	0.406516	0.37681	0.00152277
0.314629	0.503115	no_significant_change	ENSG00000196182	STK40	protein_coding	chr1	-	36850012
0.258949	0.499983	no_significant_change	ENSG00000196284	SUPT3H	protein_coding	chr6	-	44776879	0.173171	0.0900715	-0.277539	0.18187
0.0974413	-0.162646	sig_DOWN_in_Aniso	ENSG00000196284	SUPT3H	protein_coding	chr6	-	44797454
0.00191098	0.1137	sig_UP_in_Aniso	ENSG00000196449	YRDC	protein_coding	chr1	-	38268615	-0.0468033	0.517922	-0.562501	0.000727405
0.145666	-0.29342	no_significant_change	ENSG00000196449	YRDC	protein_coding	chr1	-	38269259
0.292725	-0.556221	no_significant_change	ENSG00000196449	YRDC	protein_coding	chr1	-	38269324
0.365669	0.126964	no_significant_change	ENSG00000196476	C20orf96	protein_coding	chr20	-	251502	0.293862	9.7e-06	-1.37057	1.13e-10
0.833993	0.390717	no_significant_change	ENSG00000196476	C20orf96	protein_coding	chr20	-	251559
0.077569	-0.392843	sig_DOWN_in_Aniso	ENSG00000196476	C20orf96	protein_coding	chr20	-	270072
0.0210016	0.140442	sig_UP_in_Aniso	ENSG00000196923	PDLIM7	protein_coding	chr5	-	176910395	0.727092	7.33e-05	0.762475	1.82e-06
0.0514363	-0.270009	sig_DOWN_in_Aniso	ENSG00000196923	PDLIM7	protein_coding	chr5	-	176917245
0.46177	0.151425	no_significant_change	ENSG00000197323	TRIM33	protein_coding	chr1	-	114935415	0.0234391	0.824042	-1.5166	1.62e-28
0.676934	0.317382	no_significant_change	ENSG00000197323	TRIM33	protein_coding	chr1	-	114938543
0.489019	-0.421872	no_significant_change	ENSG00000197323	TRIM33	protein_coding	chr1	-	114940241
0.00248425	-1.07867	sig_DOWN_in_Aniso	ENSG00000197323	TRIM33	protein_coding	chr1	-	114947448
0.978144	-0.0372366	no_significant_change	ENSG00000197498	RPF2	protein_coding	chr6	+	111346793	-0.259518	0.000700921	0.19726	0.0893205
0.993928	-0.125333	no_significant_change	ENSG00000197498	RPF2	protein_coding	chr6	+	111346971
0.889169	0.14268	no_significant_change	ENSG00000197498	RPF2	protein_coding	chr6	+	111347296
0.885213	0.134107	no_significant_change	ENSG00000197498	RPF2	protein_coding	chr6	+	111349159
0.0341592	0.691331	sig_UP_in_Aniso	ENSG00000197498	RPF2	protein_coding	chr6	+	111349330
0.880211	-0.163125	no_significant_change	ENSG00000197498	RPF2	protein_coding	chr6	+	111349465
0.701041	0.264841	no_significant_change	ENSG00000197903	HIST1H2BK	protein_coding	chr6	-	27103705	1.83604	9.66e-66	1.28176	0.00585548
0.0513505	0.436692	sig_UP_in_Aniso	ENSG00000197903	HIST1H2BK	protein_coding	chr6	-	27105074
0.0372256	-0.10005	sig_DOWN_in_Aniso	ENSG00000197903	HIST1H2BK	protein_coding	chr6	-	27106071
0.00943795	0.627264	sig_UP_in_Aniso	ENSG00000198034	RPS4X	protein_coding	chrX	-	71475512	not detected
0.954683	-0.243792	no_significant_change	ENSG00000198034	RPS4X	protein_coding	chrX	-	71491893
0.998699	-0.047131	no_significant_change	ENSG00000198034	RPS4X	protein_coding	chrX	-	71491967
0.994424	-0.0294406	no_significant_change	ENSG00000198034	RPS4X	protein_coding	chrX	-	71492021
0.859666	-0.0205082	no_significant_change	ENSG00000198034	RPS4X	protein_coding	chrX	-	71492452
0.0172713	-0.749142	sig_DOWN_in_Aniso	ENSG00000198597	ZNF536	protein_coding	chr19	+	31029957	1.24155	1.03e-54	-0.265805	0.0498754
0.183481	0.276334	no_significant_change	ENSG00000198597	ZNF536	protein_coding	chr19	+	31048965
0.998637	0.0393276	no_significant_change	ENSG00000198597	ZNF536	protein_coding	chr19	+	31204492
0.00529606	0.611628	sig_UP_in_Aniso	ENSG00000198642	KLHL9	protein_coding	chr9	-	21324052	-1.53261	2.57e-77	not detected
0.00529606	-0.334424	sig_DOWN_in_Aniso	ENSG00000198642	KLHL9	protein_coding	chr9	-	21331017
0.0656454	-0.769733	sig_DOWN_in_Aniso	ENSG00000198700	IPO9	protein_coding	chr1	+	201831934	0.167488	0.0214831	-0.125483	0.474302
0.994396	0.0328591	no_significant_change	ENSG00000198700	IPO9	protein_coding	chr1	+	201845500
0.981037	0.148685	no_significant_change	ENSG00000198700	IPO9	protein_coding	chr1	+	201845716
0.998637	0.0181433	no_significant_change	ENSG00000198700	IPO9	protein_coding	chr1	+	201846088
0.978144	-0.116848	no_significant_change	ENSG00000198700	IPO9	protein_coding	chr1	+	201847116
0.904925	-0.21876	no_significant_change	ENSG00000198700	IPO9	protein_coding	chr1	+	201850114
0.875789	0.264644	no_significant_change	ENSG00000198700	IPO9	protein_coding	chr1	+	201850212
0.954683	0.114209	no_significant_change	ENSG00000198700	IPO9	protein_coding	chr1	+	201852905
0.998699	0.0292886	no_significant_change	ENSG00000198700	IPO9	protein_coding	chr1	+	201853421
0.017259	-0.0567499	sig_DOWN_in_Aniso	ENSG00000198805	PNP	protein_coding	chr14	+	20945246	0.615953	8.36e-12	1.0211	8.11e-06
0.0929376	0.443443	sig_UP_in_Aniso	ENSG00000198805	PNP	protein_coding	chr14	+	20946164
0.370369	0.412488	no_significant_change	ENSG00000203819	HIST2H2BD	ncRNA	chr1	-	149821427	not detected		not detected
0.134668	0.28582	no_significant_change	ENSG00000203819	HIST2H2BD	ncRNA	chr1	-	149821483
0.0717356	-0.338243	sig_DOWN_in_Aniso	ENSG00000203819	HIST2H2BD	ncRNA	chr1	-	149821828
0.987941	-0.174891	no_significant_change	ENSG00000204852	TCTN1	protein_coding	chr12	+	111068060	0.078764	0.708312	-0.177272	0.326327
0.162246	-0.0836811	no_significant_change	ENSG00000204852	TCTN1	protein_coding	chr12	+	111086930
0.000580274	1.44617	sig_UP_in_Aniso	ENSG00000204852	TCTN1	protein_coding	chr12	+	111205478
0.0226219	0.440967	sig_UP_in_Aniso	ENSG00000205560	CPT1B	protein_coding	chr22	-	51007289	not detected		not detected
0.0206215	0.906883	sig_UP_in_Aniso	ENSG00000205560	CPT1B	protein_coding	chr22	-	51007511
1.76685e-05	-0.396735	sig_DOWN_in_Aniso	ENSG00000205560	CPT1B	protein_coding	chr22	-	51017391
3.78461e-05	0.810893	sig_UP_in_Aniso	ENSG00000205821	RP1-59D14.3	ncRNA	chr17	-	2308866	1.83556	3.82e-28	0.392803	0.0128372
5.56455e-05	-0.67462	sig_DOWN_in_Aniso	ENSG00000205821	RP1-59D14.3	ncRNA	chr17	-	2319347
0.592249	0.0159221	no_significant_change	ENSG00000210195	J01415.22	ncRNA	chrM	+	15888	-1.1019	3.8e-23	not detected
0.950177	0.0683039	no_significant_change	ENSG00000210195	J01415.22	ncRNA	chrM	+	15947
0.962805	-0.0365165	no_significant_change	ENSG00000210195	J01415.22	ncRNA	chrM	+	16016
0.0836917	-0.110713	sig_DOWN_in_Aniso	ENSG00000210195	J01415.22	ncRNA	chrM	+	16091
0.242342	-0.10223	no_significant_change	ENSG00000210195	J01415.22	ncRNA	chrM	+	16149
0.998699	0.0541262	no_significant_change	ENSG00000210195	J01415.22	ncRNA	chrM	+	16247
0.976707	0.0781785	no_significant_change	ENSG00000210195	J01415.22	ncRNA	chrM	+	16310
0.99501	0.0481843	no_significant_change	ENSG00000210195	J01415.22	ncRNA	chrM	+	16363
0.945513	0.0832192	no_significant_change	ENSG00000210195	J01415.22	ncRNA	chrM	+	16416
0.998699	0.0206157	no_significant_change	ENSG00000210195	J01415.22	ncRNA	chrM	+	16487
0.999592	0.0304988	no_significant_change	ENSG00000210195	J01415.22	ncRNA	chrM	+	16545
0.0178274	0.232678	sig_UP_in_Aniso	ENSG00000210196	J01415.23	ncRNA	chrM	-	14742	-0.765782	2.73e-35	not detected
0.114356	0.326524	no_significant_change	ENSG00000210196	J01415.23	ncRNA	chrM	-	14799
0.627334	0.199546	no_significant_change	ENSG00000210196	J01415.23	ncRNA	chrM	-	14853
0.90328	0.0862032	no_significant_change	ENSG00000210196	J01415.23	ncRNA	chrM	-	14909
0.756802	0.133193	no_significant_change	ENSG00000210196	J01415.23	ncRNA	chrM	-	14979
0.341544	0.207949	no_significant_change	ENSG00000210196	J01415.23	ncRNA	chrM	-	15030
0.0839415	0.247102	sig_UP_in_Aniso	ENSG00000210196	J01415.23	ncRNA	chrM	-	15091
0.0975967	0.204967	sig_UP_in_Aniso	ENSG00000210196	J01415.23	ncRNA	chrM	-	15145
0.402426	0.232769	no_significant_change	ENSG00000210196	J01415.23	ncRNA	chrM	-	15229
0.978144	0.0141955	no_significant_change	ENSG00000210196	J01415.23	ncRNA	chrM	-	15313
0.984263	0.00548807	no_significant_change	ENSG00000210196	J01415.23	ncRNA	chrM	-	15394
0.998699	-0.0674607	no_significant_change	ENSG00000210196	J01415.23	ncRNA	chrM	-	15458
0.999592	-0.0592706	no_significant_change	ENSG00000210196	J01415.23	ncRNA	chrM	-	15527
0.998637	-0.0659457	no_significant_change	ENSG00000210196	J01415.23	ncRNA	chrM	-	15602
0.9681	0.00660594	no_significant_change	ENSG00000210196	J01415.23	ncRNA	chrM	-	15674
0.939335	0.0181051	no_significant_change	ENSG00000210196	J01415.23	ncRNA	chrM	-	15766
0.998637	-0.0336808	no_significant_change	ENSG00000210196	J01415.23	ncRNA	chrM	-	15823
0.999592	-0.032104	no_significant_change	ENSG00000210196	J01415.23	ncRNA	chrM	-	15882
0.96783	-0.155152	no_significant_change	ENSG00000210196	J01415.23	ncRNA	chrM	-	15952
0.913541	0.0134759	no_significant_change	ENSG00000210196	J01415.23	ncRNA	chrM	-	16025
0.630051	0.119369	no_significant_change	ENSG00000210196	J01415.23	ncRNA	chrM	-	16110
0.796506	-0.366255	no_significant_change	ENSG00000210196	J01415.23	ncRNA	chrM	-	16200
0.878492	-0.127519	no_significant_change	ENSG00000210196	J01415.23	ncRNA	chrM	-	16295
0.362007	-0.163102	no_significant_change	ENSG00000210196	J01415.23	ncRNA	chrM	-	16360
0.043793	-0.237018	sig_DOWN_in_Aniso	ENSG00000210196	J01415.23	ncRNA	chrM	-	16411
0.32494	-0.194381	no_significant_change	ENSG00000210196	J01415.23	ncRNA	chrM	-	16477
0.0017144	1.27552	sig_UP_in_Aniso	ENSG00000213337	ANKRD39	protein_coding	chr2	-	97503650	-0.0809178	0.394034	0.0811514	0.682802
0.889382	-0.221414	no_significant_change	ENSG00000213337	ANKRD39	protein_coding	chr2	-	97513724
0.816855	-0.0645375	no_significant_change	ENSG00000213337	ANKRD39	protein_coding	chr2	-	97513776
0.954683	-0.0385021	no_significant_change	ENSG00000213523	SRA1	protein_coding	chr5	-	139929652	-0.0809178	0.394034	0.0811514	0.682802
0.787696	-0.253195	no_significant_change	ENSG00000213523	SRA1	protein_coding	chr5	-	139930004
0.357045	-0.0954808	no_significant_change	ENSG00000213523	SRA1	protein_coding	chr5	-	139930089
5.83014e-08	0.84356	sig_UP_in_Aniso	ENSG00000213523	SRA1	protein_coding	chr5	-	139937852
0.998699	0.0434221	no_significant_change	ENSG00000213762	ZNF134	protein_coding	chr19	+	58133290	0.448779	2.65e-21	0.300158	0.301305
0.136191	0.158622	no_significant_change	ENSG00000213762	ZNF134	protein_coding	chr19	+	58134721
0.090131	-0.230564	sig_DOWN_in_Aniso	ENSG00000213762	ZNF134	protein_coding	chr19	+	58136091
0.0791024	0.231199	sig_UP_in_Aniso	ENSG00000214046	C19orf42	protein_coding	chr19	-	16741563	-0.273986	0.000162183	-0.46886	0.00383725
0.784969	-0.27667	no_significant_change	ENSG00000214046	C19orf42	protein_coding	chr19	-	16744607
0.991788	-0.0336702	no_significant_change	ENSG00000214046	C19orf42	protein_coding	chr19	-	16756958
0.980126	-0.153376	no_significant_change	ENSG00000214046	C19orf42	protein_coding	chr19	-	16757315
0.81566	-0.0659876	no_significant_change	ENSG00000214046	C19orf42	protein_coding	chr19	-	16757369
0.984263	0.146099	no_significant_change	ENSG00000214756	METTL12	protein_coding	chr11	+	62433044	not detected		not detected
0.00185358	-0.383324	sig_DOWN_in_Aniso	ENSG00000214756	METTL12	protein_coding	chr11	+	62433182
0.0753977	0.861401	sig_UP_in_Aniso	ENSG00000214756	METTL12	protein_coding	chr11	+	62434542
6.00607e-06	0.694963	sig_UP_in_Aniso	ENSG00000214783	POLR2J4	ncRNA	chr7	-	44000492	-0.27199	6.02e-05	0.908763	2e-09
0.274765	-0.450882	no_significant_change	ENSG00000214783	POLR2J4	ncRNA	chr7	-	44017356
0.00929594	-0.39513	sig_DOWN_in_Aniso	ENSG00000214783	POLR2J4	ncRNA	chr7	-	44017417
0.973717	0.0870931	no_significant_change	ENSG00000214783	POLR2J4	ncRNA	chr7	-	44024099
0.0492505	0.224128	sig_UP_in_Aniso	ENSG00000214796	RP11-480I12.5	ncRNA	chr1	-	202822014	1.08831	2.18e-38	1.01586	1.25e-11
0.0492505	-0.335315	sig_DOWN_in_Aniso	ENSG00000214796	RP11-480I12.5	ncRNA	chr1	-	202826574
0.142014	0.245185	no_significant_change	ENSG00000214941	ZSWIM7	protein_coding	chr17	-	15879875	-0.00045059	0.996035	-0.973541	3.81e-06
0.0859905	-0.147704	sig_DOWN_in_Aniso	ENSG00000214941	ZSWIM7	protein_coding	chr17	-	15881045
0.0936388	0.636798	sig_UP_in_Aniso	ENSG00000215039	CD27-AS1	ncRNA	chr12	-	6548332	1.83633	1.52e-16	1.5658	8.27e-05
0.999208	0.00741086	no_significant_change	ENSG00000215039	CD27-AS1	ncRNA	chr12	-	6556287
0.0798815	-0.534326	sig_DOWN_in_Aniso	ENSG00000215039	CD27-AS1	ncRNA	chr12	-	6556793
0.593883	1.03404	no_significant_change	ENSG00000220323	HIST2H2BC	ncRNA	chr1	+	149815430	not detected		not detected
0.556237	0.615663	no_significant_change	ENSG00000220323	HIST2H2BC	ncRNA	chr1	+	149815708
0.914443	0.227963	no_significant_change	ENSG00000220323	HIST2H2BC	ncRNA	chr1	+	149816683
0.0871639	-0.373588	sig_DOWN_in_Aniso	ENSG00000220323	HIST2H2BC	ncRNA	chr1	+	149818283
0.00752001	-0.413305	sig_DOWN_in_Aniso	ENSG00000223959	AFG3L1P	ncRNA	chr16	+	90051109	1.21167	2.93e-19	-0.0543543	0.741248
0.904925	0.144347	no_significant_change	ENSG00000223959	AFG3L1P	ncRNA	chr16	+	90062968
0.137855	0.198285	no_significant_change	ENSG00000223959	AFG3L1P	ncRNA	chr16	+	90063028
0.984263	-0.122183	no_significant_change	ENSG00000226950	DANCR	ncRNA	chr4	+	53580165	-0.599637	3.93e-08	-0.083129	0.674957
0.156137	-0.138585	no_significant_change	ENSG00000226950	DANCR	ncRNA	chr4	+	53580303
0.00386963	0.720806	sig_UP_in_Aniso	ENSG00000226950	DANCR	ncRNA	chr4	+	53590335
0.418579	-0.126171	no_significant_change	ENSG00000229036	RP1-20N2.6	ncRNA	chr6	+	143810503	-0.504707	2.09e-06	-0.107414	0.473375
0.955266	-0.177705	no_significant_change	ENSG00000229036	RP1-20N2.6	ncRNA	chr6	+	143811141
0.00400506	1.22404	sig_UP_in_Aniso	ENSG00000229036	RP1-20N2.6	ncRNA	chr6	+	143856114
0.625551	0.0798213	no_significant_change	ENSG00000229807	XIST	ncRNA	chrX	-	73040493	-0.52203	0.00168475	0.899821	2.59e-05
0.945513	0.001623	no_significant_change	ENSG00000229807	XIST	ncRNA	chrX	-	73040745
0.280751	-0.434462	no_significant_change	ENSG00000229807	XIST	ncRNA	chrX	-	73041452
0.000194727	-0.508522	sig_DOWN_in_Aniso	ENSG00000229807	XIST	ncRNA	chrX	-	73041504
0.116582	-0.720996	no_significant_change	ENSG00000229807	XIST	ncRNA	chrX	-	73041614
0.980209	-0.0217997	no_significant_change	ENSG00000229807	XIST	ncRNA	chrX	-	73044458
0.677621	0.272159	no_significant_change	ENSG00000229807	XIST	ncRNA	chrX	-	73045107
0.655158	0.1871	no_significant_change	ENSG00000230551	CTB-89H12.4	ncRNA	chr5	-	148873840	not detected		not detected
0.998699	-0.0258029	no_significant_change	ENSG00000230551	CTB-89H12.4	ncRNA	chr5	-	148873902
0.257344	0.512192	no_significant_change	ENSG00000230551	CTB-89H12.4	ncRNA	chr5	-	148874127
0.998699	-0.0271604	no_significant_change	ENSG00000230551	CTB-89H12.4	ncRNA	chr5	-	148874483
0.887502	-0.192574	no_significant_change	ENSG00000230551	CTB-89H12.4	ncRNA	chr5	-	148874578
0.999592	-0.0616585	no_significant_change	ENSG00000230551	CTB-89H12.4	ncRNA	chr5	-	148874903
0.66389	-0.354392	no_significant_change	ENSG00000230551	CTB-89H12.4	ncRNA	chr5	-	148875462
0.916316	-0.106497	no_significant_change	ENSG00000230551	CTB-89H12.4	ncRNA	chr5	-	148875554
0.682089	-0.227155	no_significant_change	ENSG00000230551	CTB-89H12.4	ncRNA	chr5	-	148875629
0.998699	-0.0780261	no_significant_change	ENSG00000230551	CTB-89H12.4	ncRNA	chr5	-	148876067
0.897715	0.086939	no_significant_change	ENSG00000230551	CTB-89H12.4	ncRNA	chr5	-	148876190
0.433944	0.477464	no_significant_change	ENSG00000230551	CTB-89H12.4	ncRNA	chr5	-	148877018
0.000248119	0.864116	sig_UP_in_Aniso	ENSG00000230551	CTB-89H12.4	ncRNA	chr5	-	148878401
0.523458	-0.0776022	no_significant_change	ENSG00000231770	TMEM44-AS1	ncRNA	chr3	+	194305636	-0.480882	8.57e-07	0.411271	0.0081272
0.93935	0.0898409	no_significant_change	ENSG00000231770	TMEM44-AS1	ncRNA	chr3	+	194310977
7.26498e-08	13.6393	sig_UP_in_Aniso	ENSG00000231770	TMEM44-AS1	ncRNA	chr3	+	194342099
0.407972	-0.38496	no_significant_change	ENSG00000234420	ZNF37BP	ncRNA	chr10	-	43009055	1.69859	3.21e-29	-1.24527	4.33e-15
0.987807	0.0846923	no_significant_change	ENSG00000234420	ZNF37BP	ncRNA	chr10	-	43015248
0.0238705	1.50086	sig_UP_in_Aniso	ENSG00000234420	ZNF37BP	ncRNA	chr10	-	43015315
0.937311	-0.219619	no_significant_change	ENSG00000234420	ZNF37BP	ncRNA	chr10	-	43016273
0.0364701	-0.358549	sig_DOWN_in_Aniso	ENSG00000234684	SDCBP2-AS1	ncRNA	chr20	+	1340506	-0.254701	0.0124464	0.0936023	0.557022
0.999592	0.0686788	no_significant_change	ENSG00000234684	SDCBP2-AS1	ncRNA	chr20	+	1343232
0.13497	0.368971	no_significant_change	ENSG00000234684	SDCBP2-AS1	ncRNA	chr20	+	1359378
0.232608	-0.210485	no_significant_change	ENSG00000237594	AP000251.2	ncRNA	chr21	+	32932600	-0.438164	0.000446265	0.199898	0.703811
0.99302	-0.0905671	no_significant_change	ENSG00000237594	AP000251.2	ncRNA	chr21	+	32932798
0.999592	-0.0512364	no_significant_change	ENSG00000237594	AP000251.2	ncRNA	chr21	+	32938292
1.06347e-08	2.27786	sig_UP_in_Aniso	ENSG00000237594	AP000251.2	ncRNA	chr21	+	33027800
1.01634e-06	-1.03596	sig_DOWN_in_Aniso	ENSG00000239045	snoU13	ncRNA	chr7	-	151722272	not detected		not detected
9.57655e-08	2.07723	sig_UP_in_Aniso	ENSG00000239045	snoU13	ncRNA	chr7	-	151724325
0.00886807	0.509727	sig_UP_in_Aniso	ENSG00000240291	RP11-499P20.2	ncRNA	chr10	-	18801544	0.965375	1.31e-06	0.450756	0.0370095
0.00886807	-0.501662	sig_DOWN_in_Aniso	ENSG00000240291	RP11-499P20.2	ncRNA	chr10	-	18834478
0.0526079	-0.0496101	sig_DOWN_in_Aniso	ENSG00000242028	C15orf63	protein_coding	chr15	+	44094070	not detected		not detected
0.194942	0.332961	no_significant_change	ENSG00000242028	C15orf63	protein_coding	chr15	+	44094185
0.812587	-0.0518588	no_significant_change	ENSG00000242247	ARFGAP3	protein_coding	chr22	-	43192536	0.0721236	0.519308	0.444548	0.017497
0.156207	0.0831164	no_significant_change	ENSG00000242247	ARFGAP3	protein_coding	chr22	-	43265778
0.0632677	-1.00918	sig_DOWN_in_Aniso	ENSG00000242247	ARFGAP3	protein_coding	chr22	-	43266918
0.456046	-0.499188	no_significant_change	ENSG00000242247	ARFGAP3	protein_coding	chr22	-	43266969
0.0166585	0.883418	sig_UP_in_Aniso	ENSG00000242794	Metazoa_SRP	ncRNA	chr1	+	232766884	not detected
0.0172713	-0.528525	sig_DOWN_in_Aniso	ENSG00000242794	Metazoa_SRP	ncRNA	chr1	+	232768667
0.0257273	-0.219678	sig_DOWN_in_Aniso	ENSG00000242802	AP5Z1	protein_coding	chr7	+	4831381	1.1678	1.99e-09	-0.497719	0.010015
0.0870141	0.86062	sig_UP_in_Aniso	ENSG00000242802	AP5Z1	protein_coding	chr7	+	4834026
9.18832e-09	0.471198	sig_UP_in_Aniso	ENSG00000244115	DNAJC25-GNG10	protein_coding	chr9	+	114416627	not detected
0.0253747	0.571785	sig_UP_in_Aniso	ENSG00000244115	DNAJC25-GNG10	protein_coding	chr9	+	114416679
9.18832e-09	-0.295107	sig_DOWN_in_Aniso	ENSG00000244115	DNAJC25-GNG10	protein_coding	chr9	+	114432504
1.47279e-07	-0.11689	sig_DOWN_in_Aniso	ENSG00000246705	H2AFJ	protein_coding	chr12	+	14927958	0.517934	0.00898659	not detected
0.0001307	1.11585	sig_UP_in_Aniso	ENSG00000246705	H2AFJ	protein_coding	chr12	+	14930934
0.0441899	0.972296	sig_UP_in_Aniso	ENSG00000251136	RP11-37B2.1	ncRNA	chr8	-	90733133	1.25883	3.48e-24	0.366838	0.0273231
0.01299	-0.367123	sig_DOWN_in_Aniso	ENSG00000251136	RP11-37B2.1	ncRNA	chr8	-	90736717
0.676934	0.345644	no_significant_change	ENSG00000253187	HOXA-AS4	ncRNA	chr7	+	27208455	not detected
0.124065	0.32832	no_significant_change	ENSG00000253187	HOXA-AS4	ncRNA	chr7	+	27208506
0.0161349	-0.220915	sig_DOWN_in_Aniso	ENSG00000253187	HOXA-AS4	ncRNA	chr7	+	27211551
0.374592	-0.116638	no_significant_change	ENSG00000257103	LSM14A	protein_coding	chr19	+	34718522	-0.195743	0.00655577	0.0784826	0.627924
0.0138438	0.134627	sig_UP_in_Aniso	ENSG00000257103	LSM14A	protein_coding	chr19	+	34718998
0.055891	-0.150359	sig_DOWN_in_Aniso	ENSG00000257103	LSM14A	protein_coding	chr19	+	34720184
0.0469176	0.803464	sig_UP_in_Aniso	ENSG00000257337	RP11-983P16.4	ncRNA	chr12	-	53436971	-0.129282	0.291403	-0.707735	0.00190404
0.0469176	-0.456562	sig_DOWN_in_Aniso	ENSG00000257337	RP11-983P16.4	ncRNA	chr12	-	53439021
0.00808163	0.189567	sig_UP_in_Aniso	ENSG00000260027	RP11-357H14.19	ncRNA	chr17	-	46698501	-1.41168	1.56e-46	-0.217039	0.226347
0.0212791	-0.758997	sig_DOWN_in_Aniso	ENSG00000260027	RP11-357H14.19	ncRNA	chr17	-	46712165
0.0196139	0.196135	sig_UP_in_Aniso	ENSG00000260269	CTD-2323K18.1	ncRNA	chr15	-	75867350	-0.406231	0.025833	-0.155016	0.592701
0.0956493	-0.695371	sig_DOWN_in_Aniso	ENSG00000260269	CTD-2323K18.1	ncRNA	chr15	-	75877854
0.00340317	-0.0670753	sig_DOWN_in_Aniso	ENSG00000260276	RP11-77H9.2	ncRNA	chr16	+	8943182
0.0624654	0.846871	sig_UP_in_Aniso	ENSG00000260276	RP11-77H9.2	ncRNA	chr16	+	8954311	0.417925	0.0036111	0.744255	0.000688797
0.00811326	-0.276029	sig_DOWN_in_Aniso	ENSG00000260448	RP11-449H11.1	ncRNA	chr16	-	25117889	-0.642728	4.74e-10	0.481581	0.0459819
0.039493	0.699335	sig_UP_in_Aniso	ENSG00000260448	RP11-449H11.1	ncRNA	chr16	-	25122283
0.0423	-0.0904219	sig_DOWN_in_Aniso	ENSG00000260527	RP11-73O6.4	protein_coding	chr6	+	126301387	1.33351	6.11e-35	0.131557	0.507182
0.0129259	1.0728	sig_UP_in_Aniso	ENSG00000260527	RP11-73O6.4	protein_coding	chr6	+	126400877
0.947662	0.092702	no_significant_change	ENSG00000260527	RP11-73O6.4	protein_coding	chr6	+	128842294
4.03347e-10	-1.3145	sig_DOWN_in_Aniso	ENSG00000264545	RP11-145E5.5	protein_coding	chr9	+	21936021	0.196467	0.284484	0.817973	1.77e-05
2.82179e-10	1.0093	sig_UP_in_Aniso	ENSG00000264545	RP11-145E5.5	protein_coding	chr9	+	21960558
0.967792	0.111633	no_significant_change	ENSG00000264545	RP11-145E5.5	protein_coding	chr9	+	21967752
0.0690166	0.349323	sig_UP_in_Aniso	ENSG00000266086	RP11-159D12.5	protein_coding	chr17	-	56066398	-0.252799	0.01216	1.15548	1.25e-07
0.929706	-0.111492	no_significant_change	ENSG00000266086	RP11-159D12.5	protein_coding	chr17	-	56078282
0.978144	-0.0642497	no_significant_change	ENSG00000266086	RP11-159D12.5	protein_coding	chr17	-	56078436
0.619908	-0.0605674	no_significant_change	ENSG00000266086	RP11-159D12.5	protein_coding	chr17	-	56080721
0.0285879	0.756915	sig_UP_in_Aniso	ENSG00000267100	ILF3-AS1	ncRNA	chr19	-	10709865	-0.336409	0.000105026	not detected
0.0133368	-0.155401	sig_DOWN_in_Aniso	ENSG00000267100	ILF3-AS1	ncRNA	chr19	-	10762539
